# Supplementary material for: Synthesis of isoxazoline analogs of stellettins
Source: Royal Society of Chemistry journal article supplement (doi:10.1039/d5ob01632k), 2025-01-01
Supplement: d5ob01632k1.pdf [file d5ob01632k1.pdf]

**Supporting Information**  
**Synthesis of Isoxazoline Analogs of Stelletins**

Yuan Wang, Zhe Wang, Miao Zhuang, Xinyi Deng, Xiaoyu Liu\*, Xiaozhen Jiao\*, and Ping Xie

*State Key Laboratory of Bioactive Substance and Function of Natural Medicines, Beijing Key Laboratory of Active Substances Discovery and Druggability Evaluation, Institute of Materia Medica, Chinese Academy of Medical Sciences and Peking Union Medical College, Beijing 100050, China.*  
Fax: +86 10 63017757; Tel: +86 10 63165242  
Email: lxya@imm.ac.cn; jiaoxz@imm.ac.cn

**Contents**

|                                                                                   | <b>page</b> |
|-----------------------------------------------------------------------------------|-------------|
| <sup>1</sup> H and <sup>13</sup> C NMR spectra of compound (±) <b>6</b>           | 2           |
| <sup>1</sup> H and <sup>13</sup> C NMR spectra of compound (±) <b>7</b>           | 3           |
| <sup>1</sup> H and <sup>13</sup> C NMR spectra of compound (±) <b>8</b>           | 4           |
| <sup>1</sup> H and <sup>13</sup> C NMR spectra of compound (±) <b>9</b>           | 5           |
| <sup>1</sup> H and <sup>13</sup> C NMR spectra of compound (±) <b>10</b>          | 6           |
| <sup>1</sup> H and <sup>13</sup> C NMR spectra of compound (±) <b>11</b>          | 7           |
| <sup>1</sup> H and <sup>13</sup> C NMR spectra of compound (±) <b>12</b>          | 8           |
| <sup>1</sup> H and <sup>13</sup> C NMR spectra of compound (±) <b>13</b>          | 9           |
| <sup>1</sup> H and <sup>13</sup> C NMR spectra of compound (±) <b>14</b>          | 10          |
| <sup>1</sup> H and <sup>13</sup> C NMR spectra of compound (±) <b>15</b>          | 11          |
| <sup>1</sup> H and <sup>13</sup> C NMR spectra of compound (±) <b>16</b>          | 12          |
| <sup>1</sup> H and <sup>13</sup> C NMR spectra of compound (±) <b>17</b>          | 13          |
| <sup>1</sup> H and <sup>13</sup> C NMR spectra of compound (±) <b>1</b>           | 14          |
| <sup>1</sup> H and <sup>13</sup> C NMR spectra of compound <b>19</b>              | 15          |
| <sup>1</sup> H and <sup>13</sup> C NMR spectra of compound <b>21</b>              | 16          |
| <sup>1</sup> H and <sup>13</sup> C NMR spectra of compound <b>22</b>              | 17          |
| <sup>1</sup> H and <sup>13</sup> C NMR spectra of compound <b>23</b>              | 18          |
| <sup>1</sup> H and <sup>13</sup> C NMR spectra of compound <b>24</b>              | 19          |
| <sup>1</sup> H and <sup>13</sup> C NMR spectra of compound <b>25</b>              | 20          |
| <sup>1</sup> H and <sup>13</sup> C NMR spectra of compound <b>2</b>               | 21          |
| <sup>1</sup> H and <sup>13</sup> C NMR spectra of compound <b>27</b>              | 22          |
| <sup>1</sup> H and <sup>13</sup> C NMR spectra of compound <b>29</b>              | 23          |
| <sup>1</sup> H and <sup>13</sup> C NMR spectra of compound <b>30</b>              | 24          |
| <sup>1</sup> H and <sup>13</sup> C NMR spectra of compound <b>3</b>               | 25          |
| <sup>1</sup> H and <sup>13</sup> C NMR spectra of compound (±) <b>1a</b>          | 26          |
| <sup>1</sup> H and <sup>13</sup> C NMR spectra of compound (±) <b>1b</b>          | 27          |
| X-Ray Diffraction Data                                                            | 28          |
| The comparison of <sup>13</sup> C NMR data of <b>25</b> and reported Gibepyrone B | 29          |
| The biological activity evaluation for (±) <b>1a</b> and (±) <b>1b</b>            | 30          |

<sup>1</sup>H NMR of compound (±)**6** (400 MHz, CDCl<sub>3</sub>)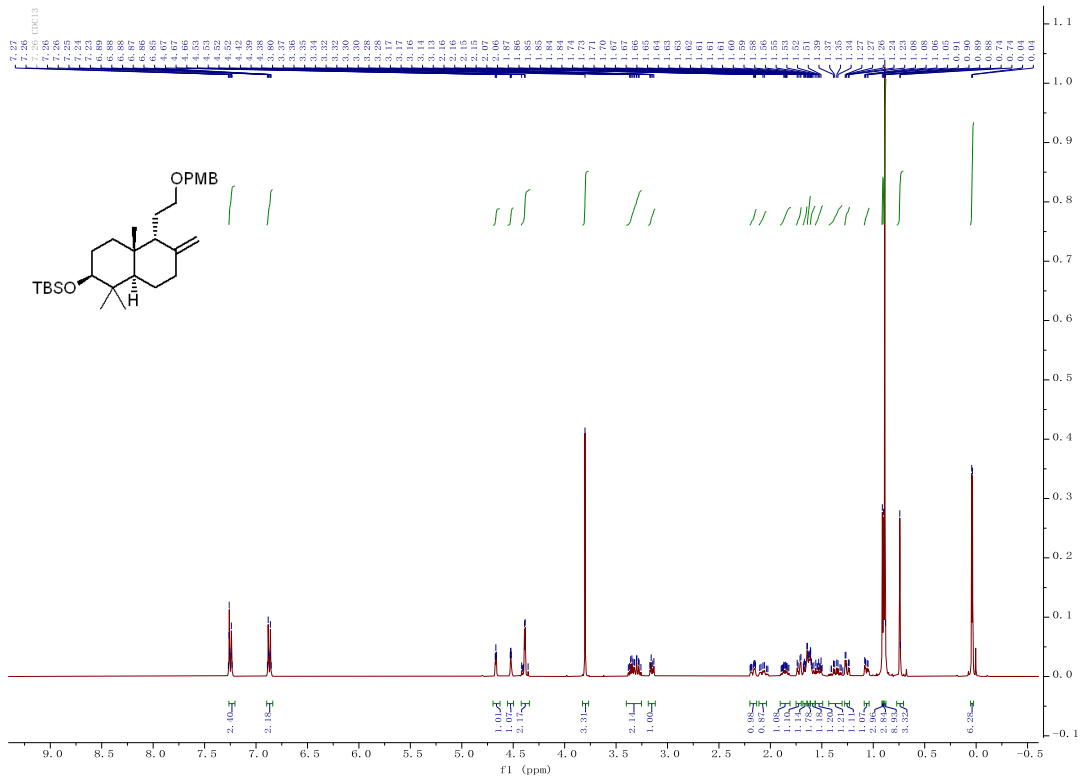 $^{13}\text{C}$  NMR of compound ( $\pm$ )**6** (100 MHz,  $\text{CDCl}_3$ )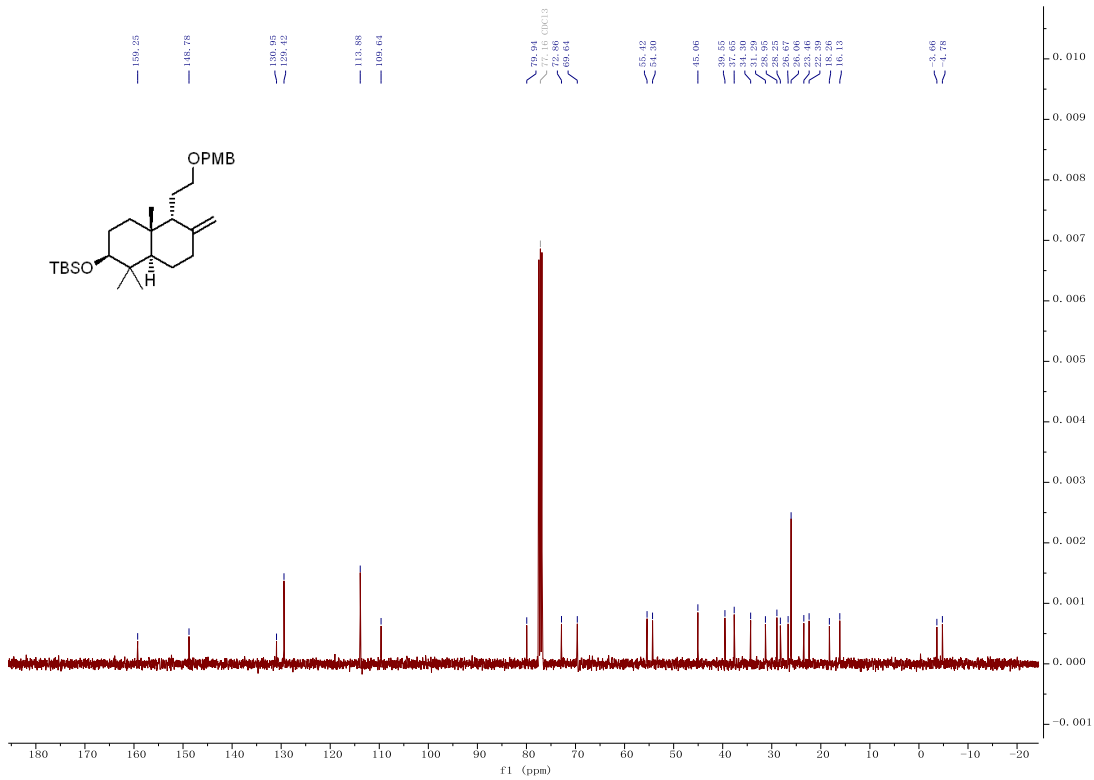

<sup>1</sup>H NMR of compound (±)**7** (400 MHz, CDCl<sub>3</sub>)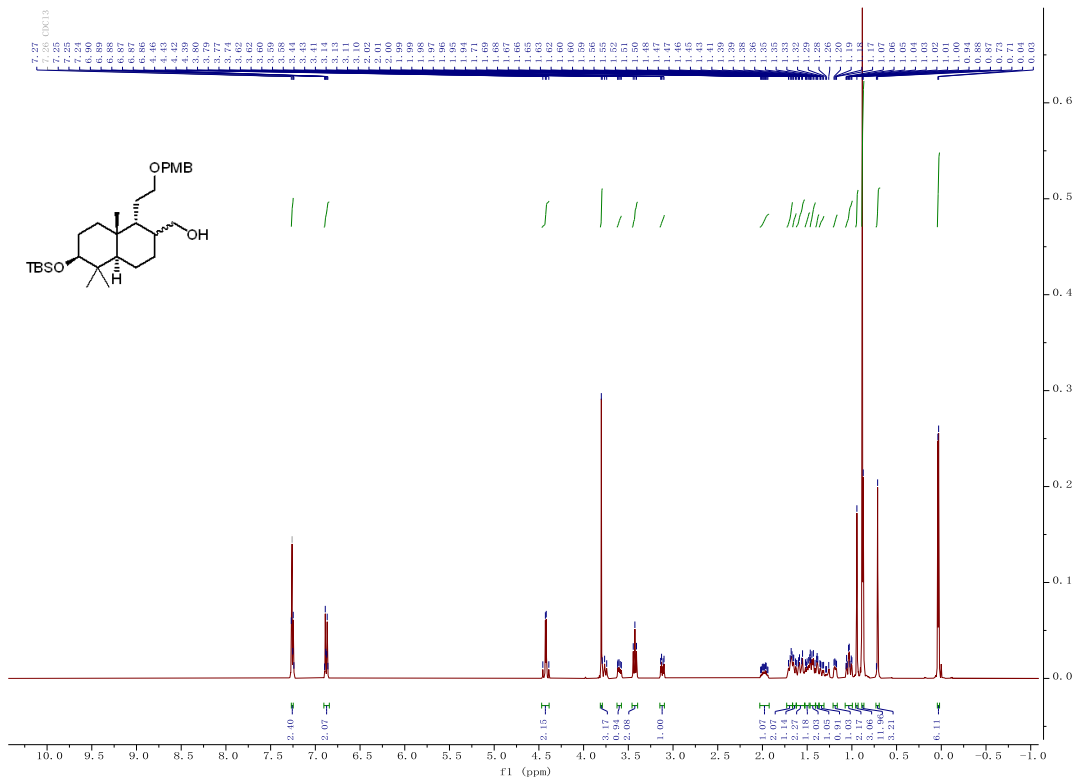

<sup>13</sup>C NMR of compound (±)**7** (100 MHz, CDCl<sub>3</sub>)

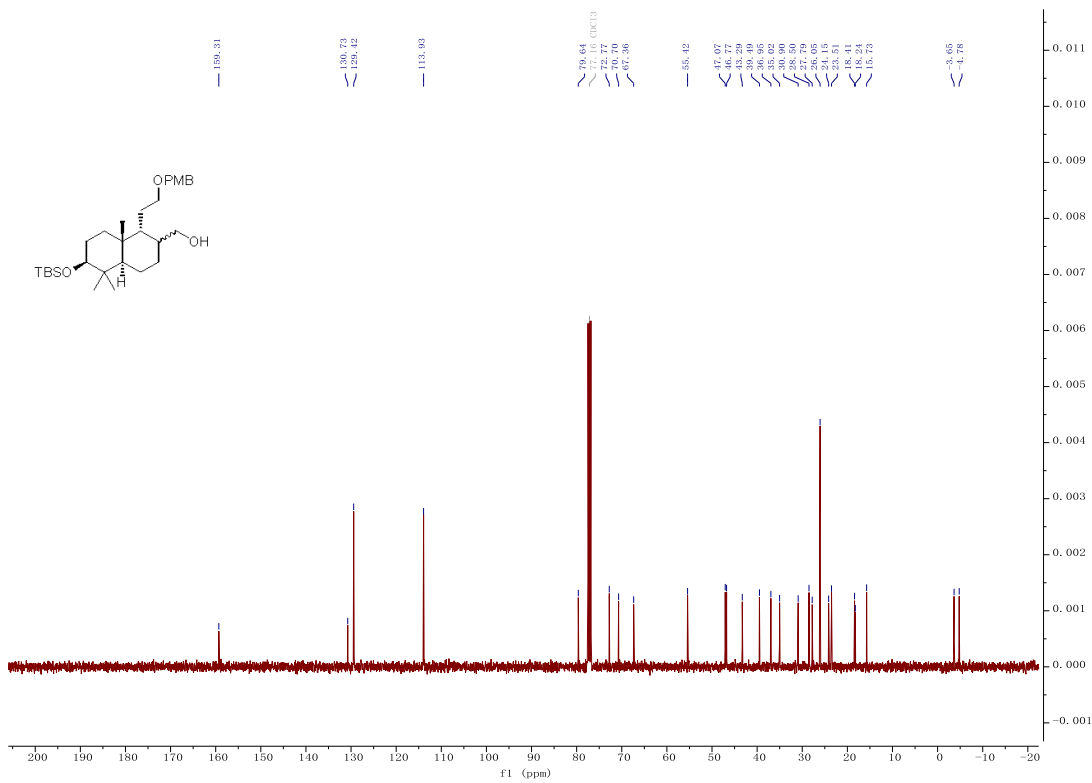

<sup>1</sup>H NMR of compound (±)**8** (400 MHz, CDCl<sub>3</sub>)

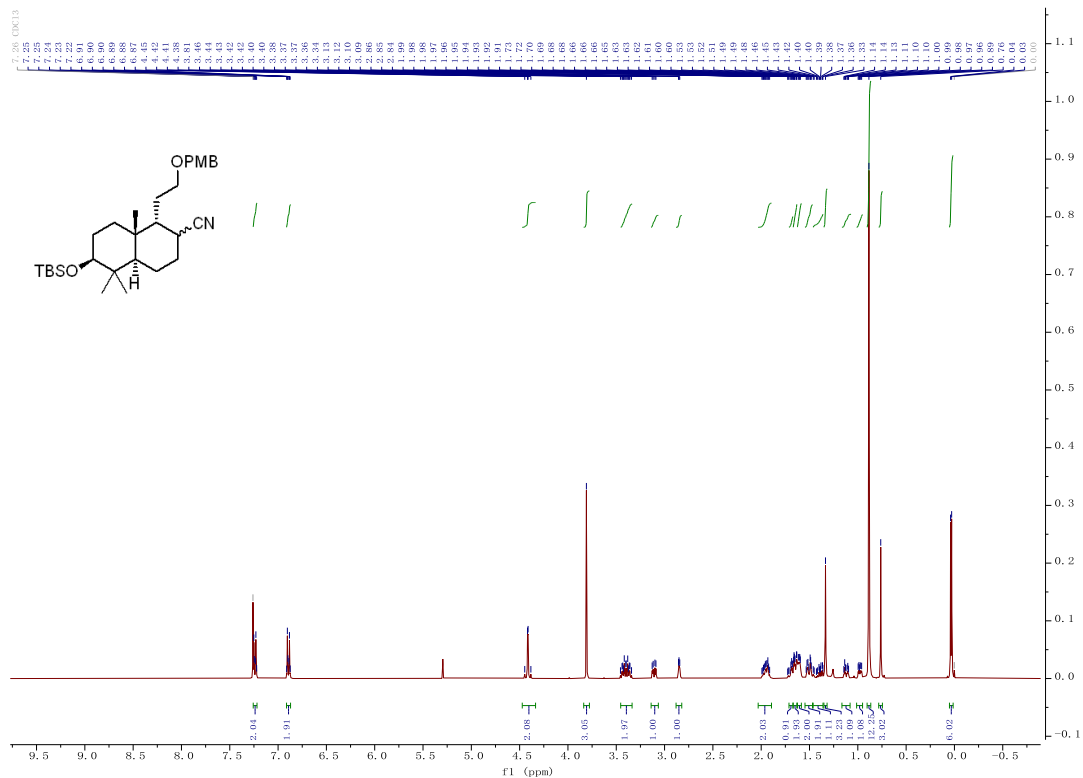

<sup>13</sup>C NMR of compound (±)**8** (100 MHz, CDCl<sub>3</sub>)

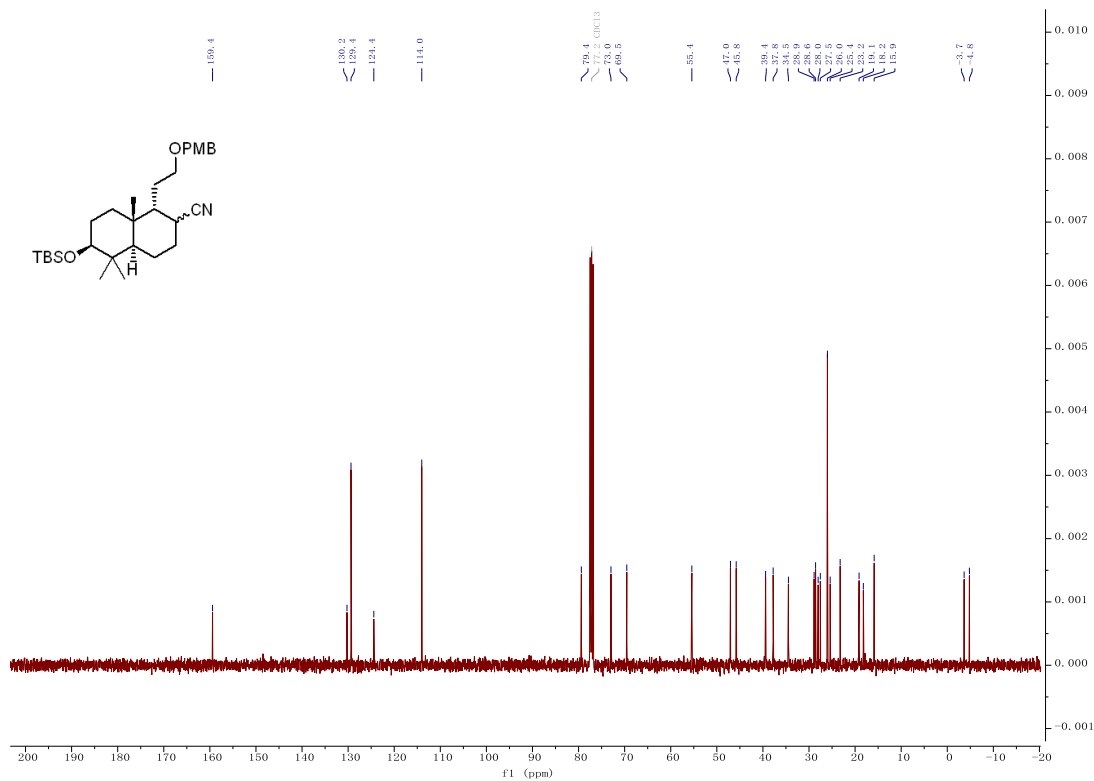

<sup>1</sup>H NMR of compound (±)**9** (400 MHz, CDCl<sub>3</sub>)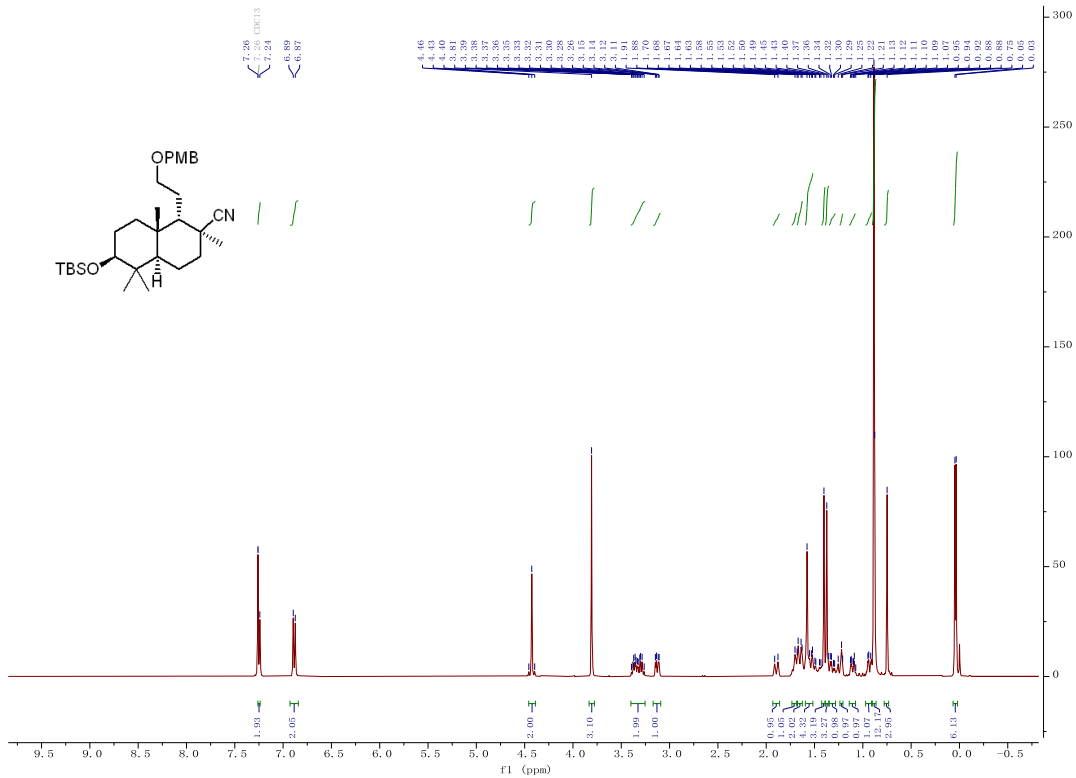 $^{13}\text{C}$  NMR of compound ( $\pm$ )**9** (100 MHz,  $\text{CDCl}_3$ )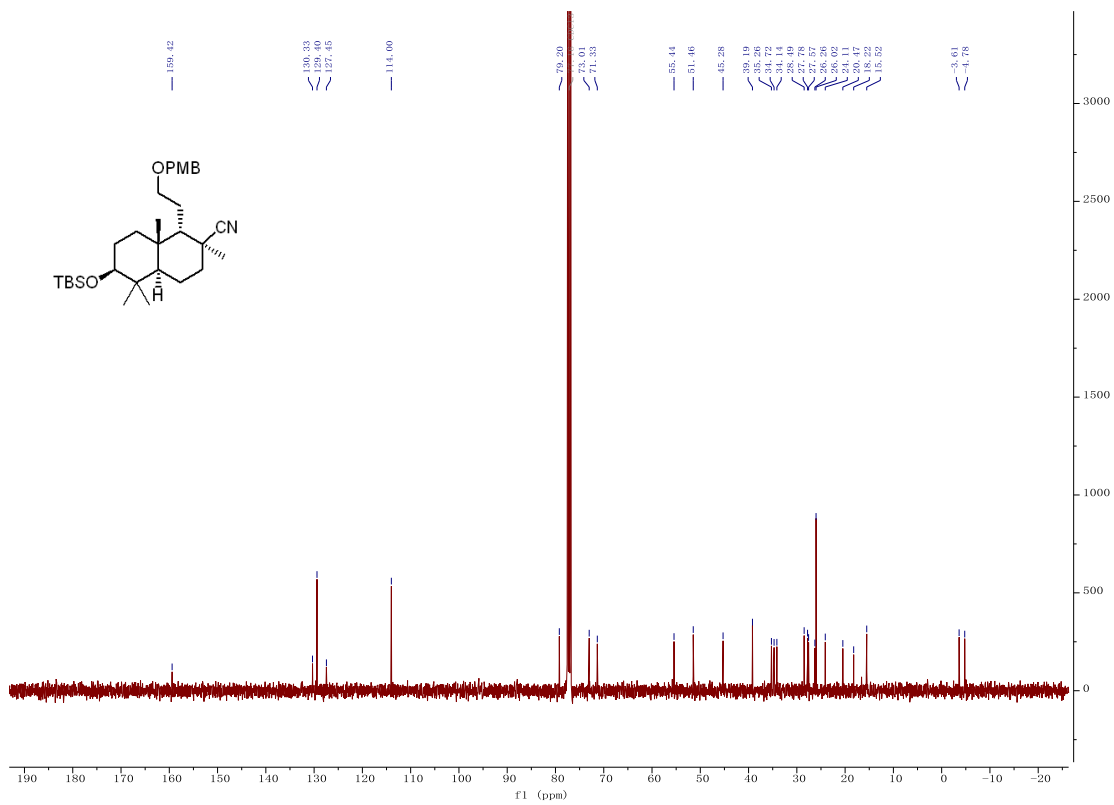

<sup>1</sup>H NMR of compound (±)**10** (400 MHz, CDCl<sub>3</sub>)

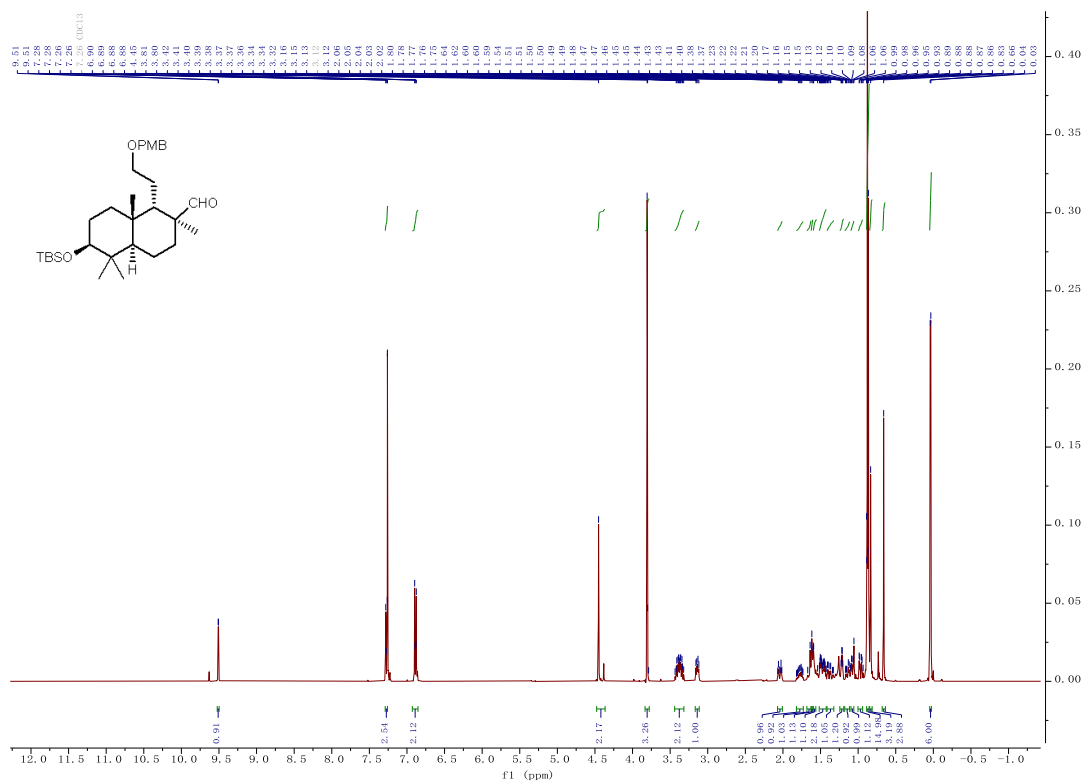

<sup>13</sup>C NMR of compound (±)**10** (100 MHz, CDCl<sub>3</sub>)

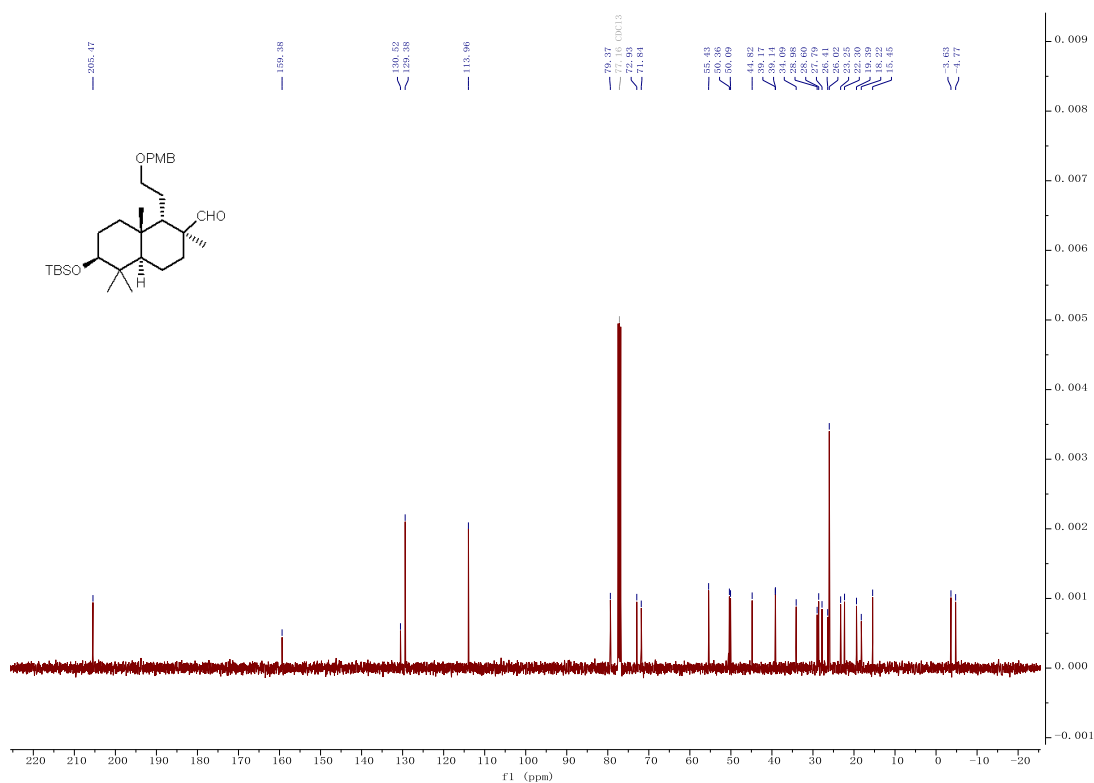

<sup>1</sup>H NMR of compound (±)**11** (400 MHz, CDCl<sub>3</sub>)

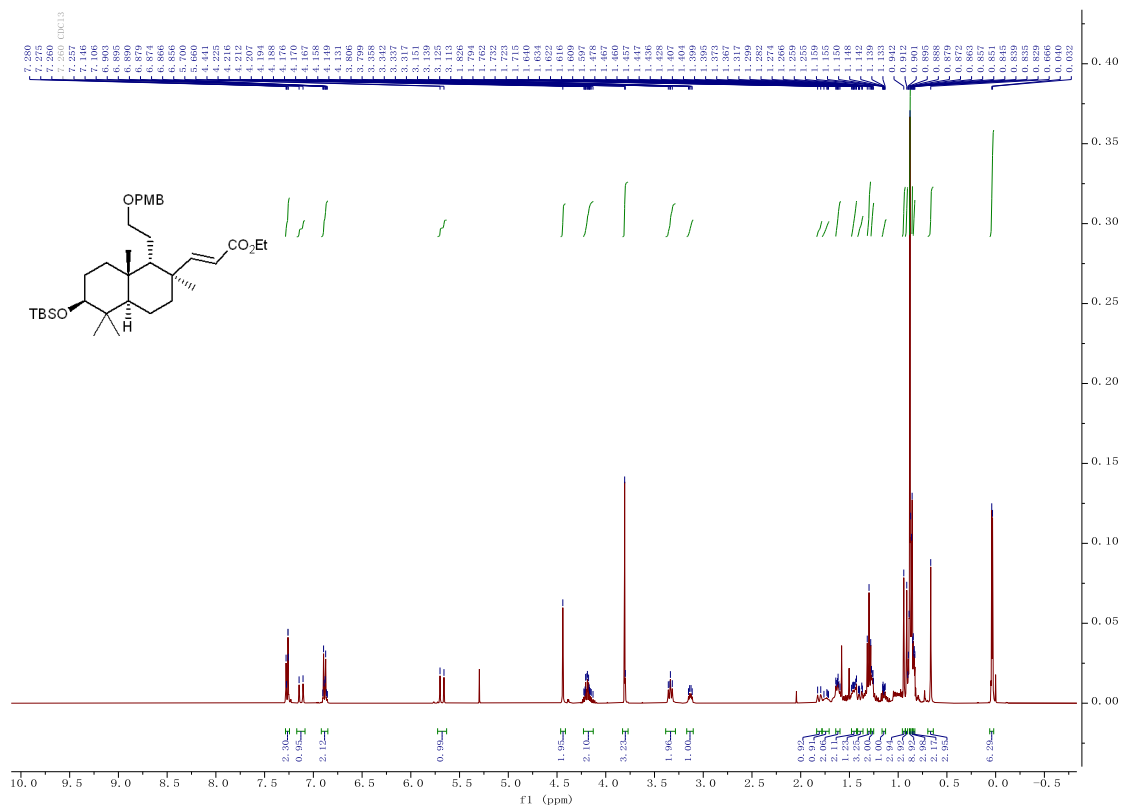

<sup>13</sup>C NMR of compound (±)**11** (100 MHz, CDCl<sub>3</sub>)

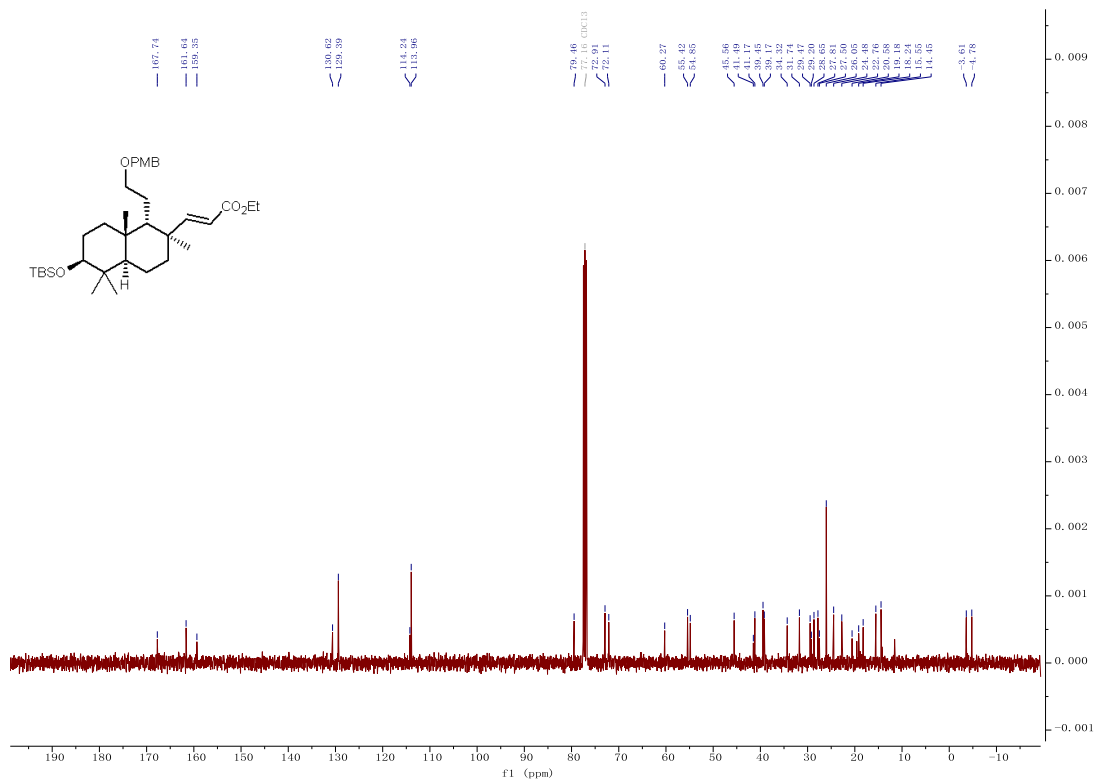

<sup>1</sup>H NMR of compound (±)**12** (400 MHz, CDCl<sub>3</sub>)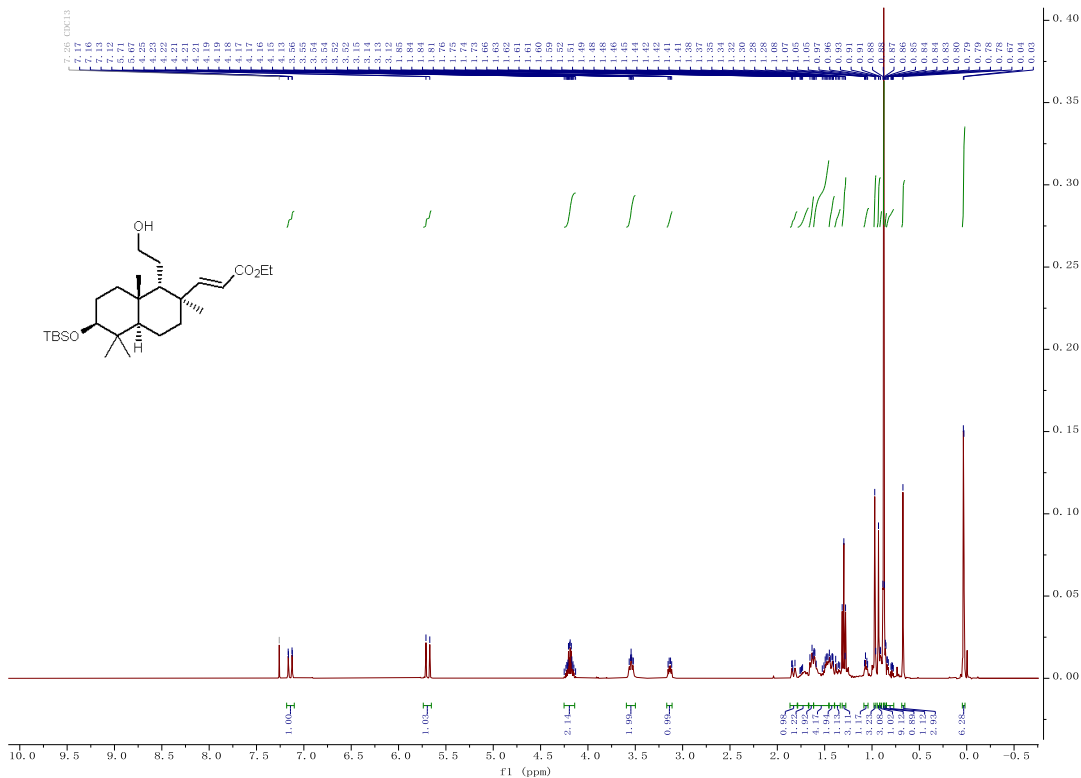 $^{13}\text{C}$  NMR of compound ( $\pm$ )**12** (100 MHz,  $\text{CDCl}_3$ )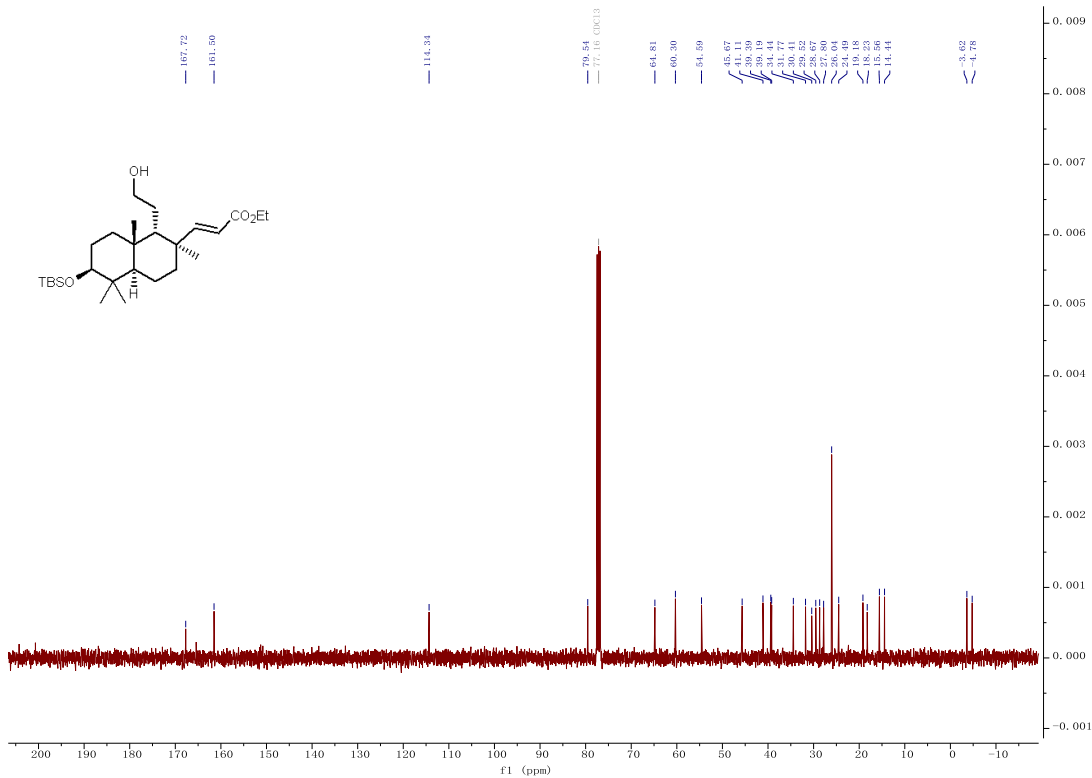



<sup>1</sup>H NMR of compound (±)**13** (400 MHz, CDCl<sub>3</sub>)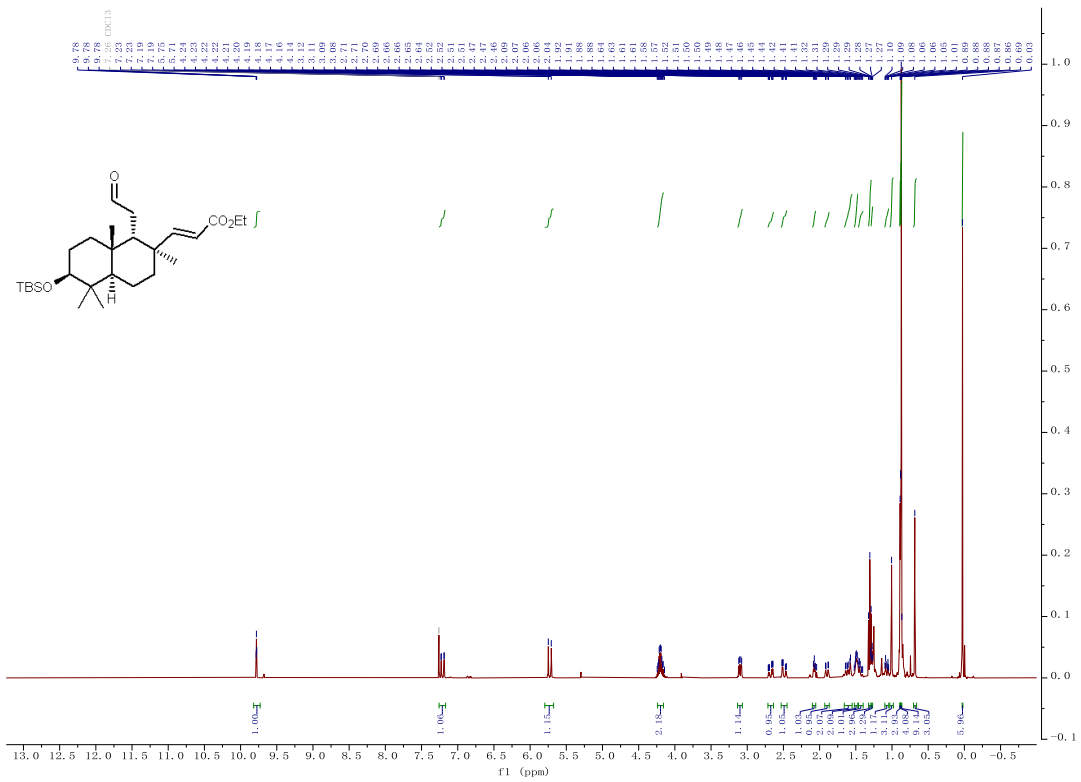 $^{13}\text{C}$  NMR of compound ( $\pm$ )**13** (100 MHz,  $\text{CDCl}_3$ )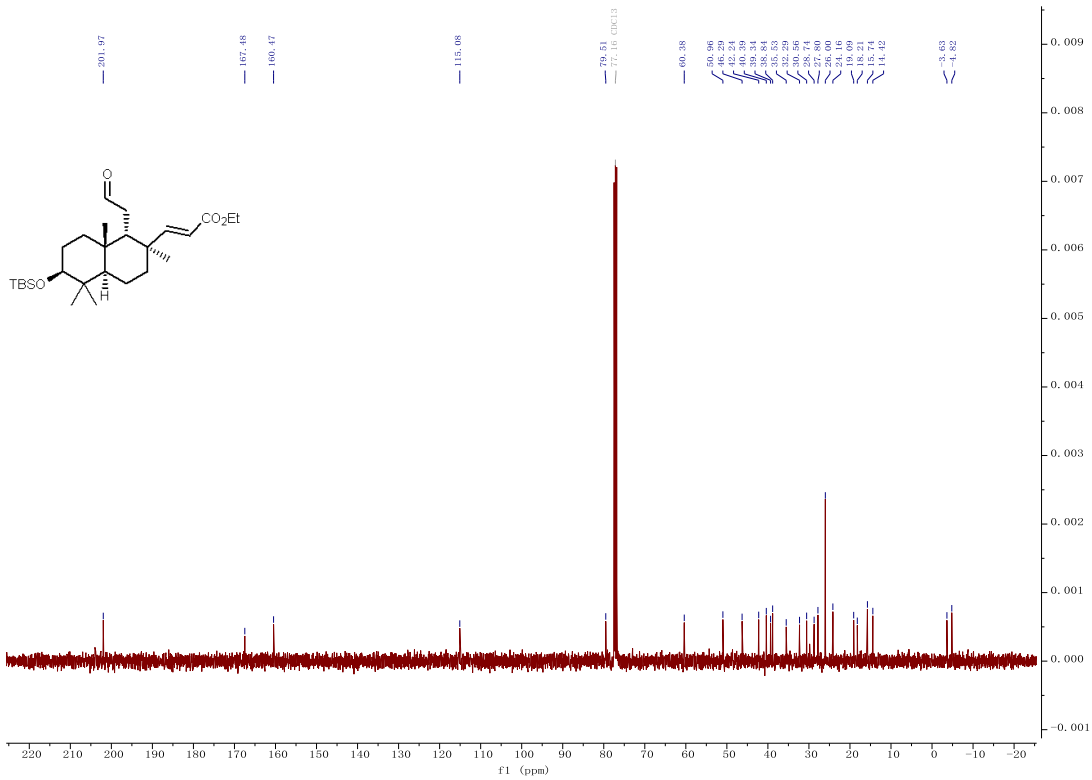

<sup>1</sup>H NMR of compound (±)**14** (500 MHz, CDCl<sub>3</sub>)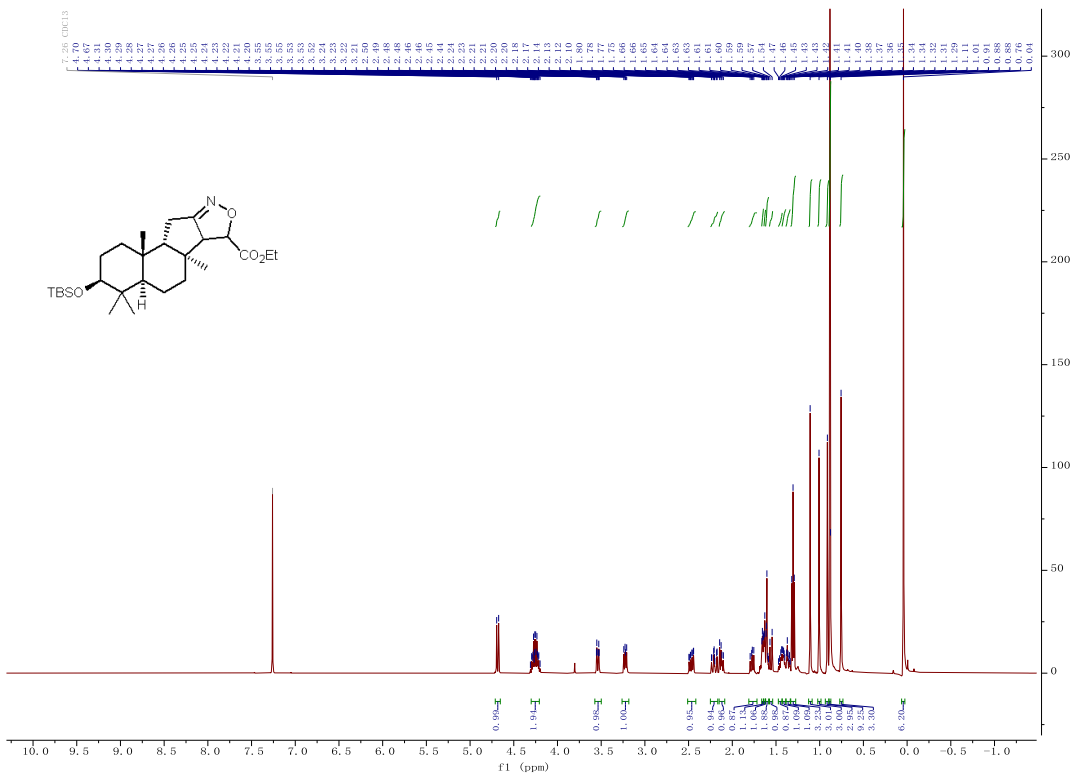 $^{13}\text{C}$  NMR of compound ( $\pm$ )**14** (125 MHz,  $\text{CDCl}_3$ )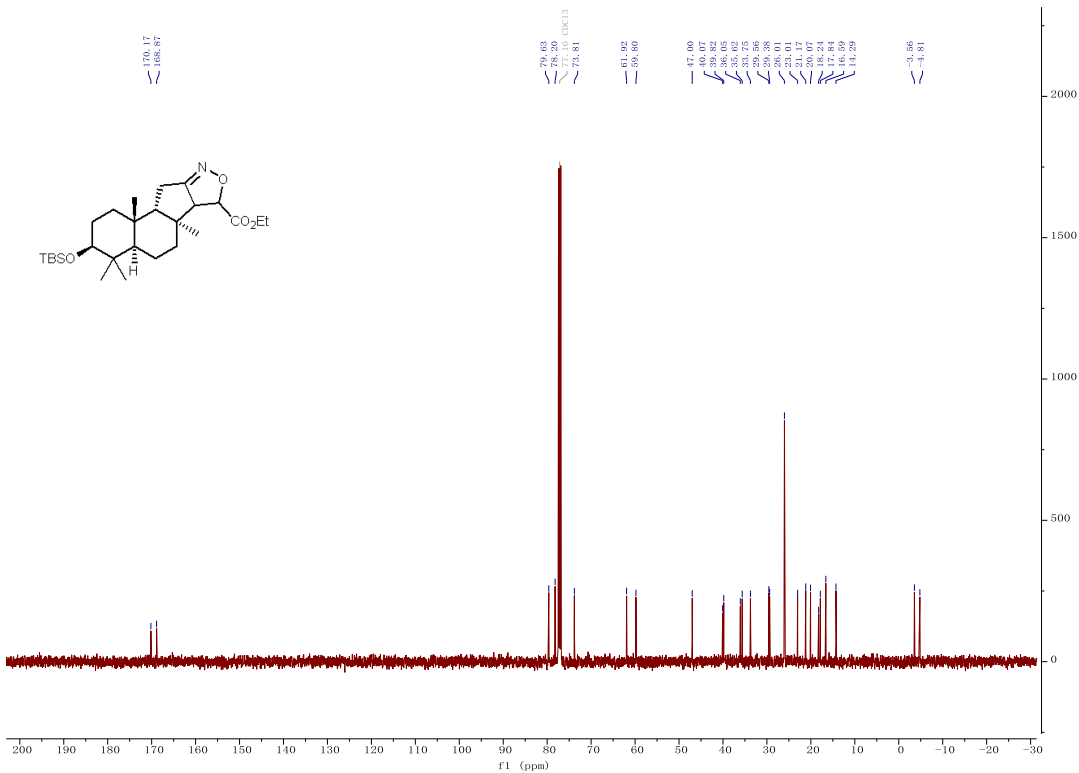

<sup>1</sup>H NMR of compound (±)**15** (400 MHz, CDCl<sub>3</sub>)

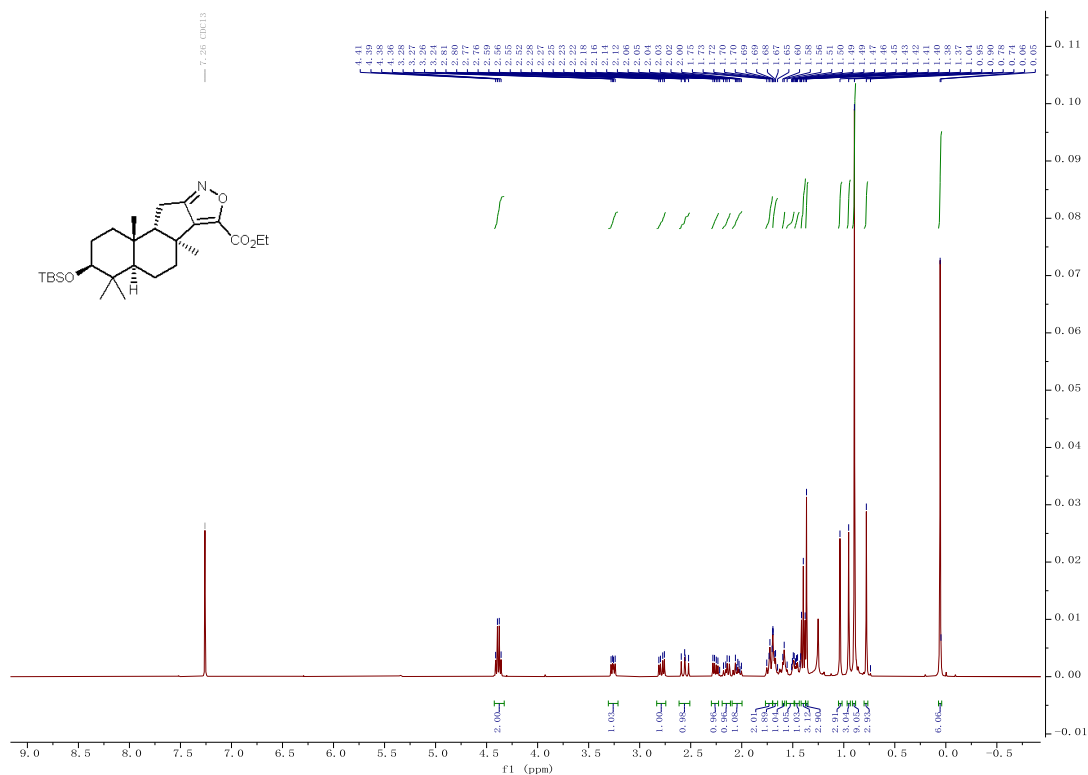

<sup>13</sup>C NMR of compound (±)**15** (100 MHz, CDCl<sub>3</sub>)

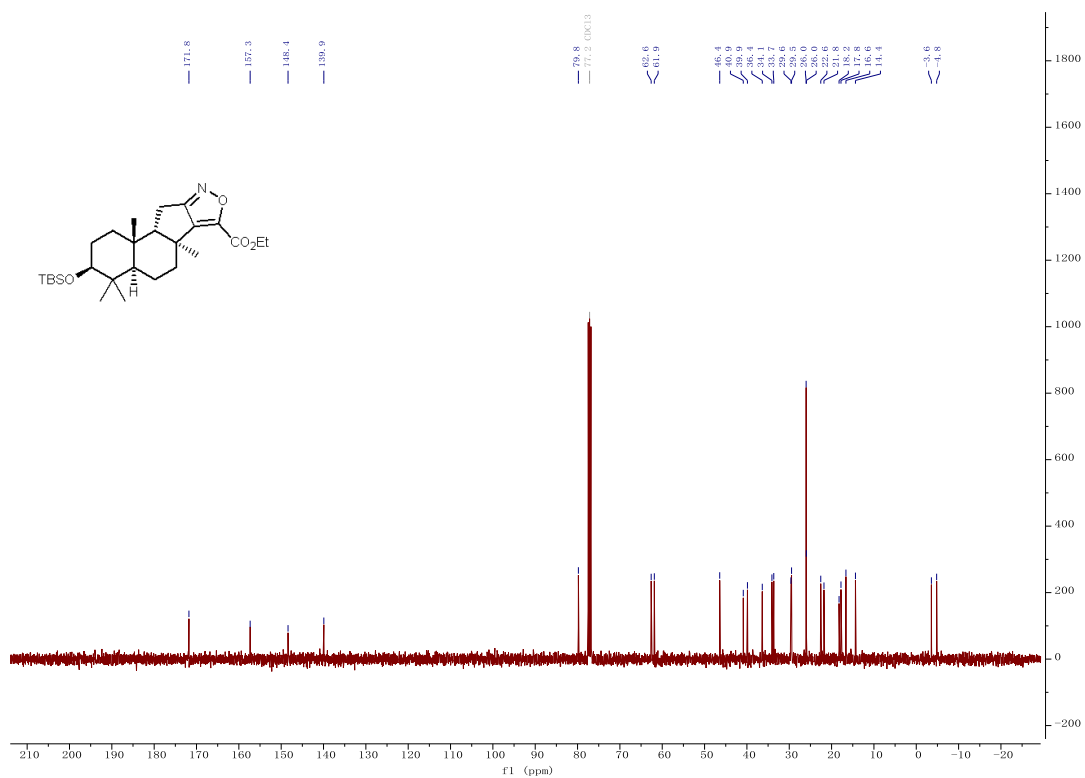

<sup>1</sup>H NMR of compound (±)**16** (400 MHz, CDCl<sub>3</sub>)

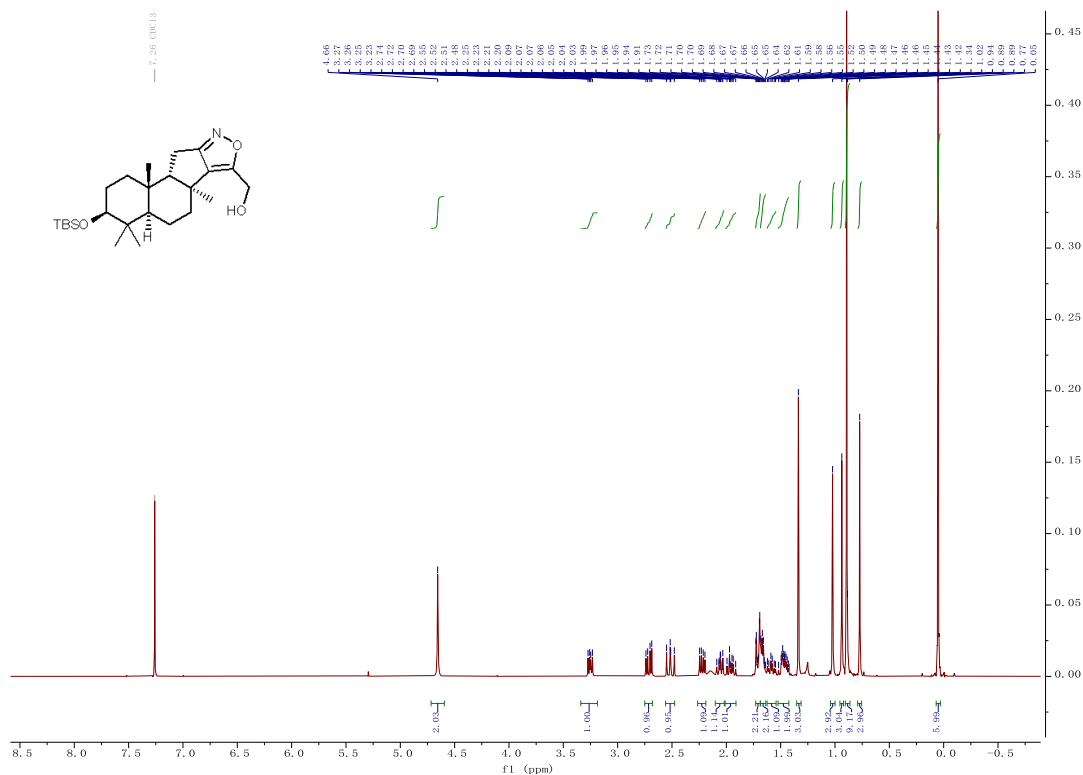

<sup>13</sup>C NMR of compound (±)**16** (100 MHz, CDCl<sub>3</sub>)

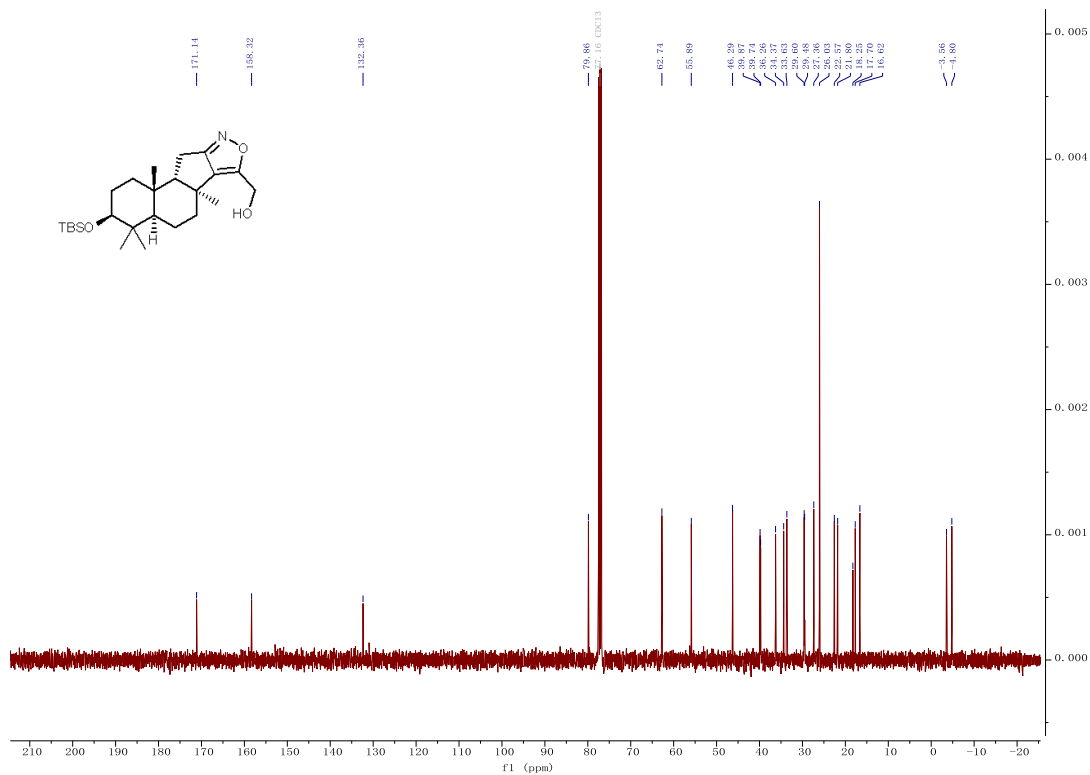

<sup>1</sup>H NMR of compound (±)**17** (400 MHz, CDCl<sub>3</sub>)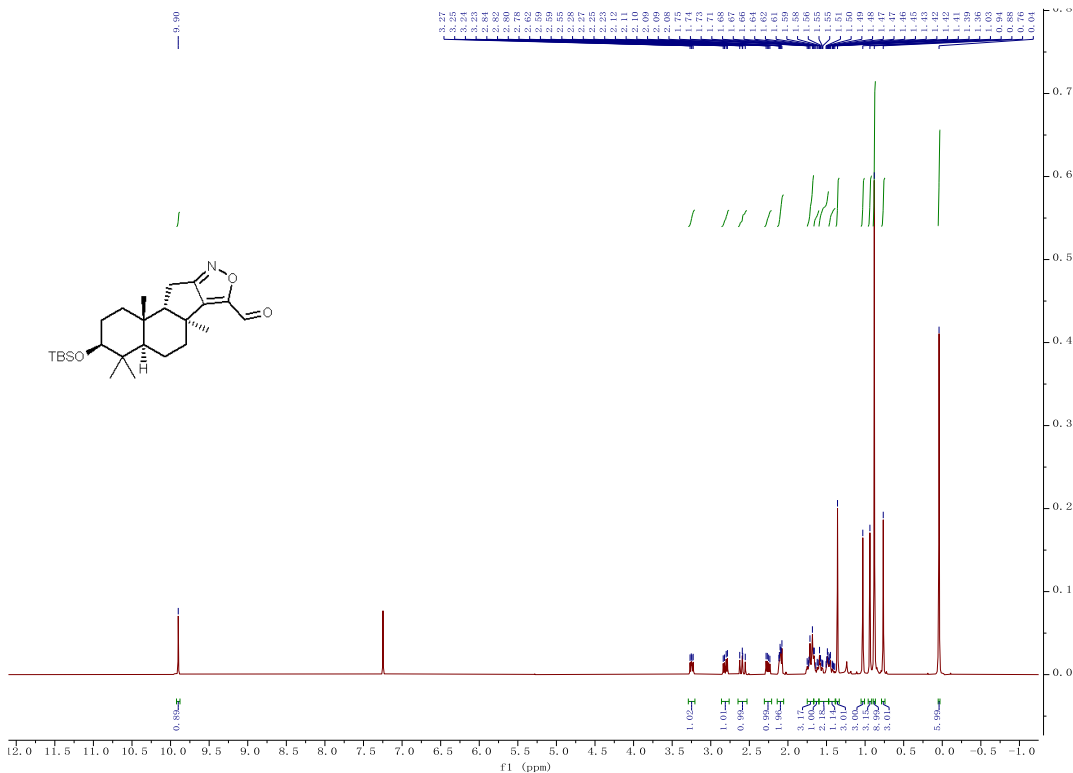 $^{13}\text{C}$  NMR of compound ( $\pm$ )**17** (100 MHz,  $\text{CDCl}_3$ )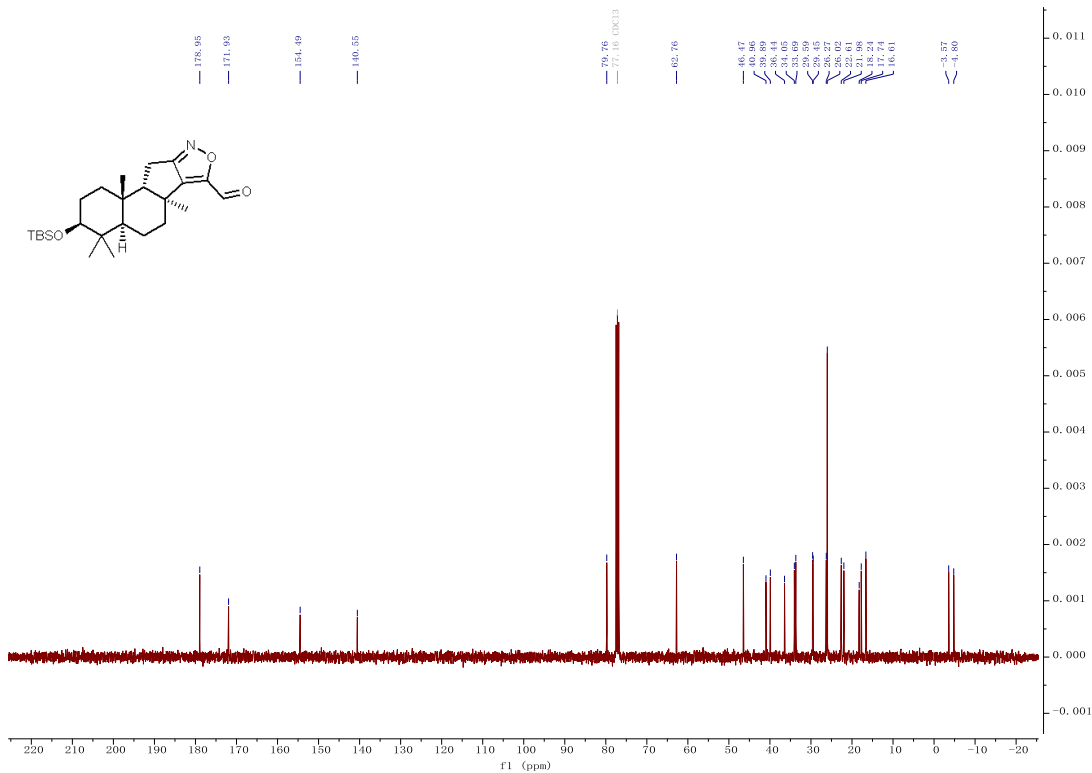

<sup>1</sup>H NMR of compound (±)**1** (400 MHz, CDCl<sub>3</sub>)

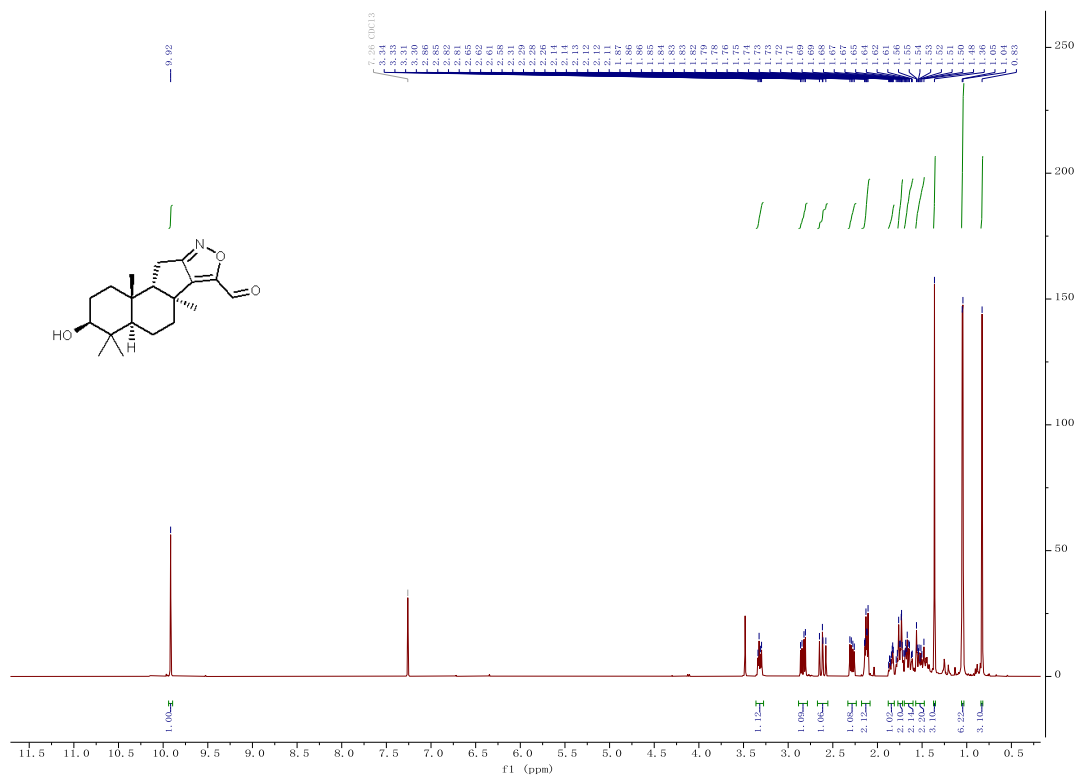

<sup>13</sup>C NMR of compound (±)**1** (100 MHz, CDCl<sub>3</sub>)

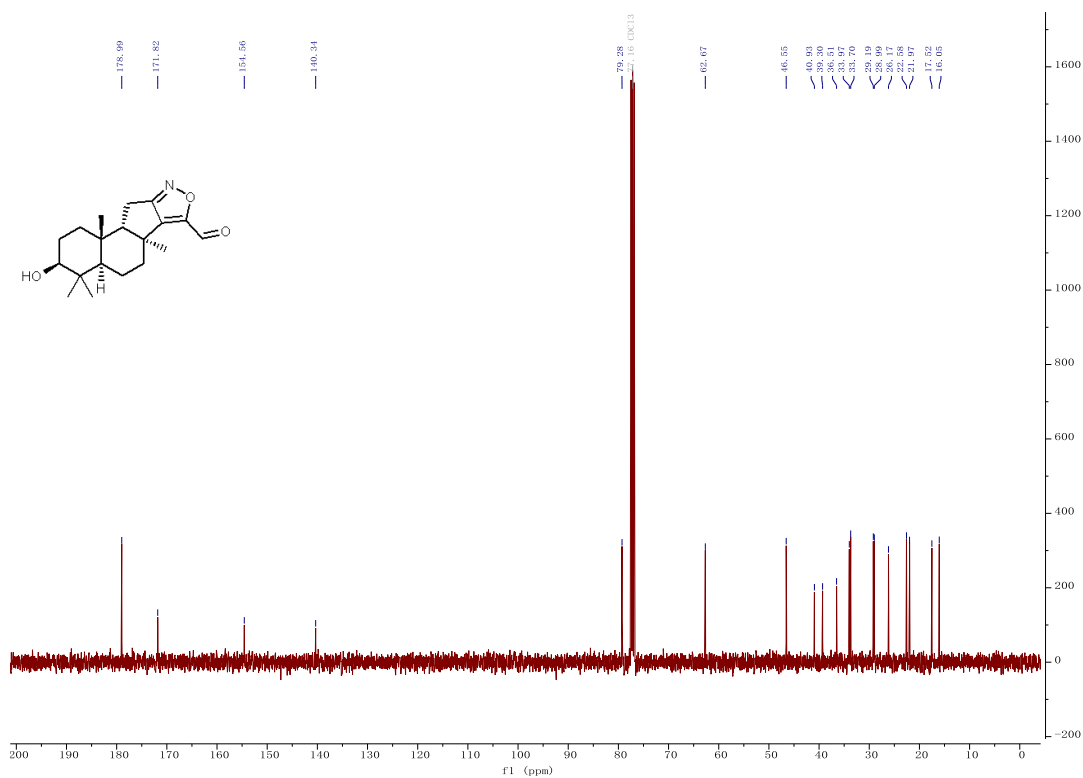

<sup>1</sup>H NMR of compound **19** (400 MHz, CDCl<sub>3</sub>)

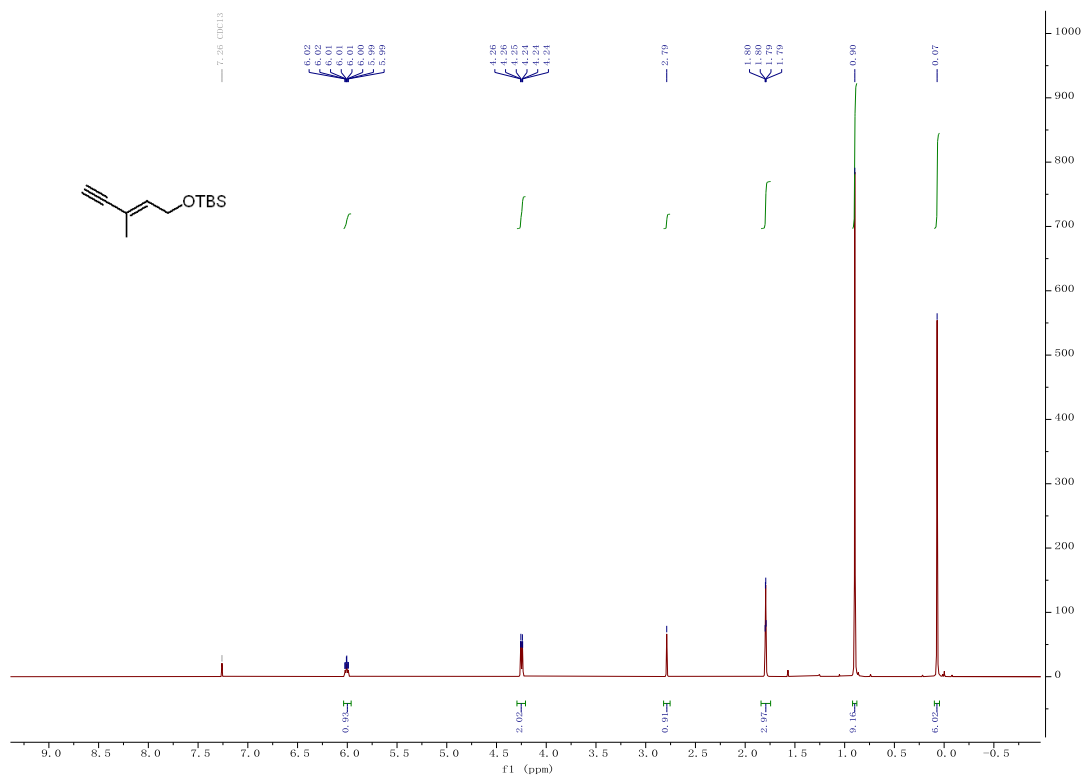

<sup>13</sup>C NMR of compound **19** (100 MHz, CDCl<sub>3</sub>)

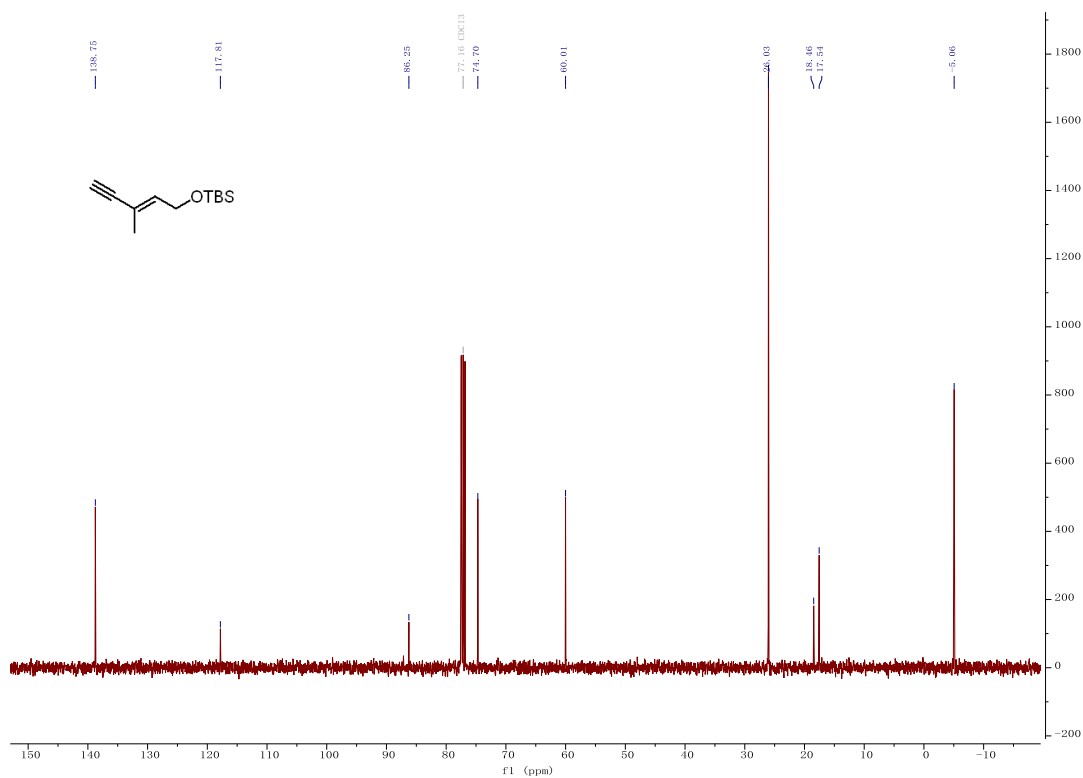

<sup>1</sup>H NMR of compound **21** (400 MHz, CDCl<sub>3</sub>)

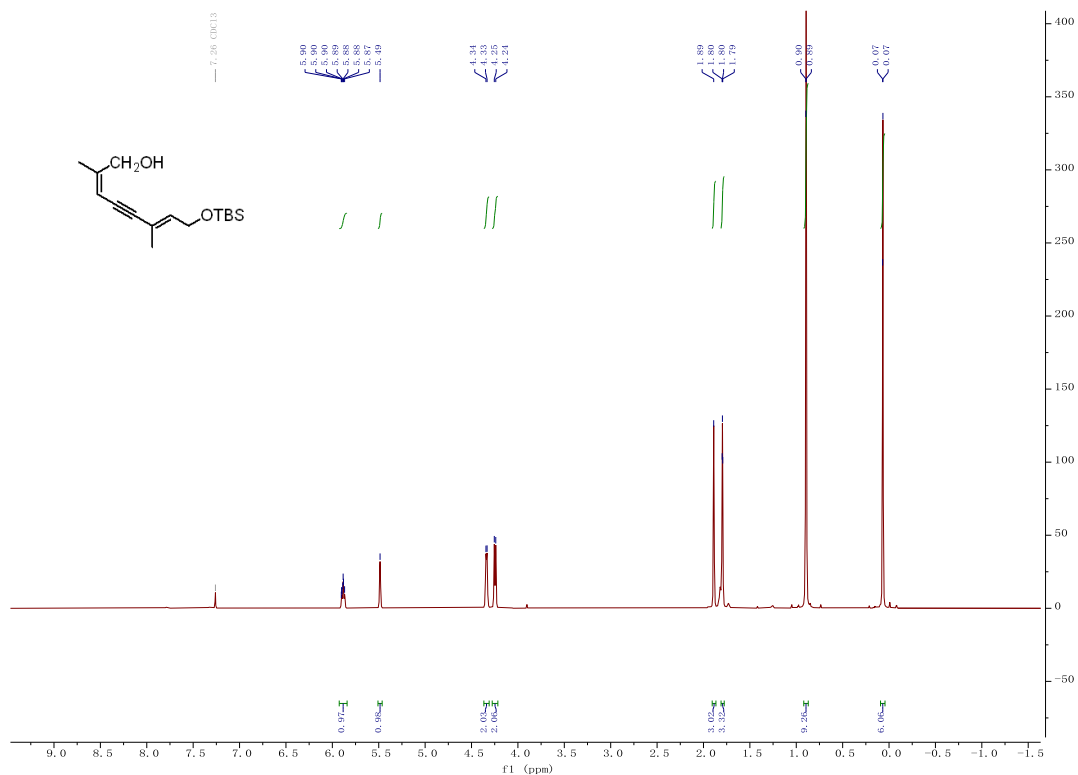

<sup>13</sup>C NMR of compound **21** (100 MHz, CDCl<sub>3</sub>)

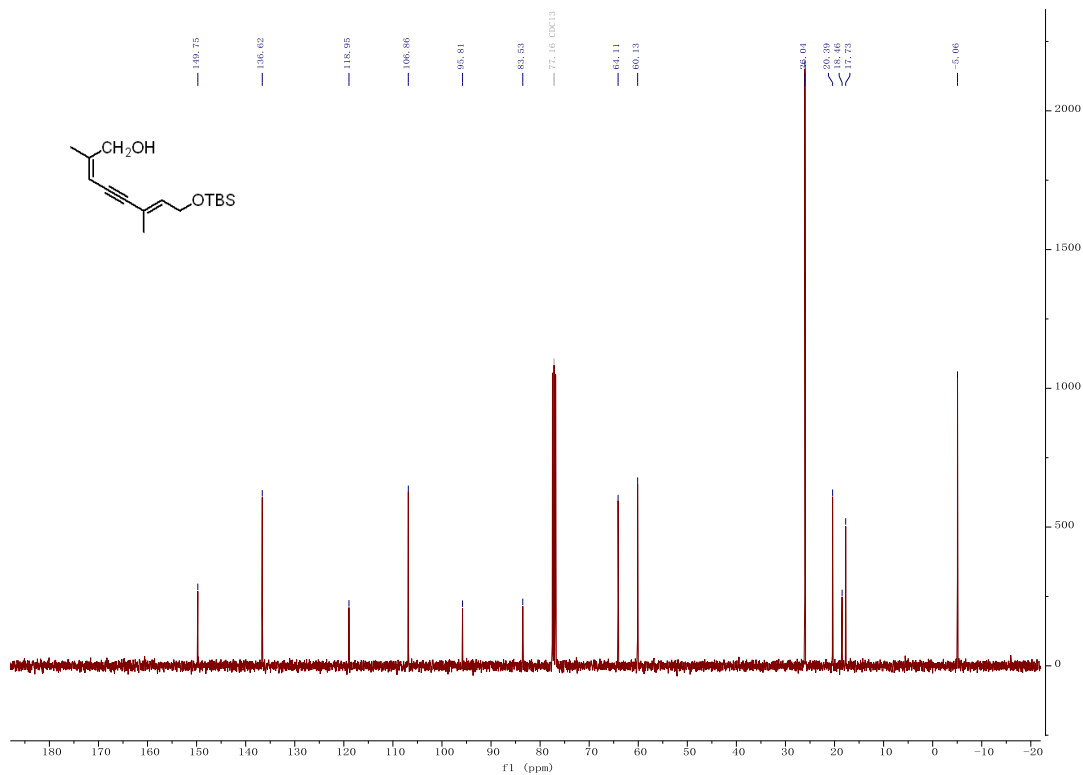



<sup>1</sup>H NMR of compound **22** (400 MHz, CDCl<sub>3</sub>)

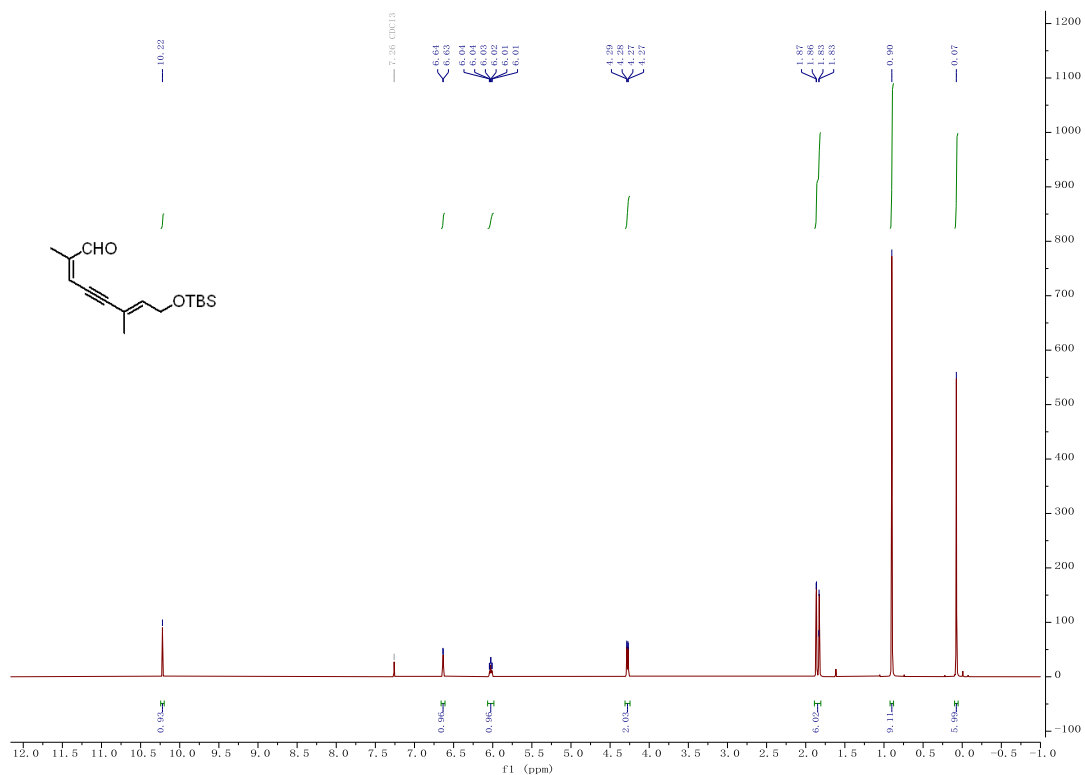

<sup>13</sup>C NMR of compound **22** (100 MHz, CDCl<sub>3</sub>)

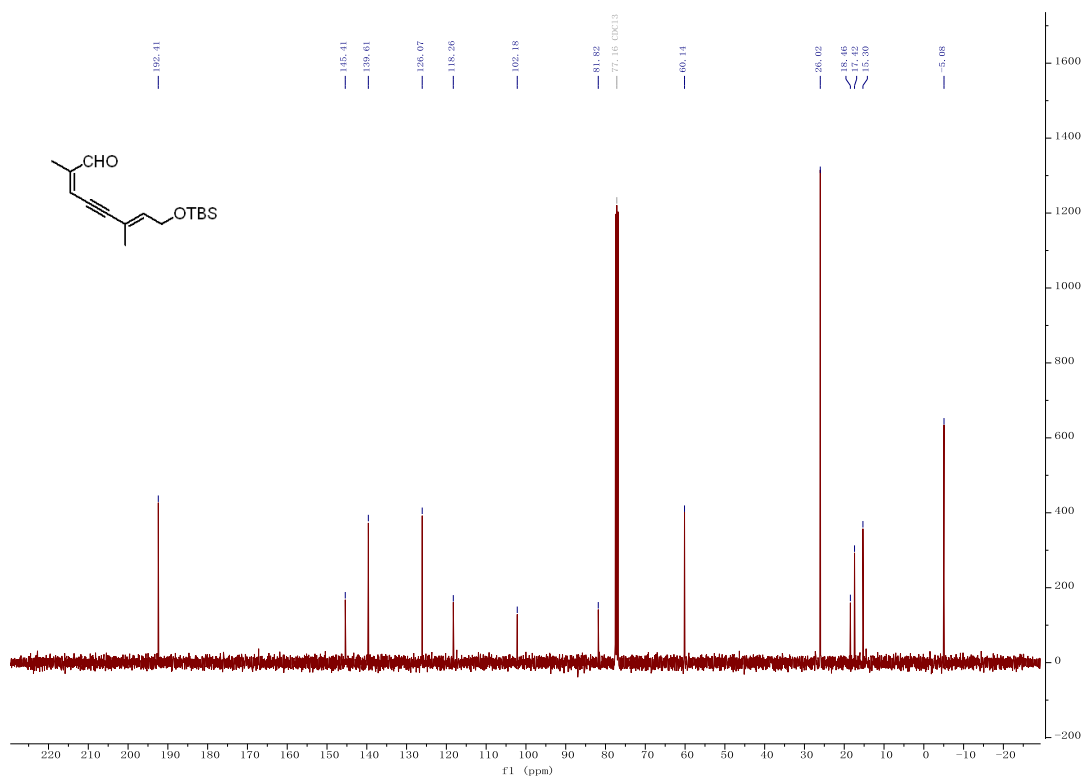

<sup>1</sup>H NMR of compound **23** (400 MHz, CDCl<sub>3</sub>)

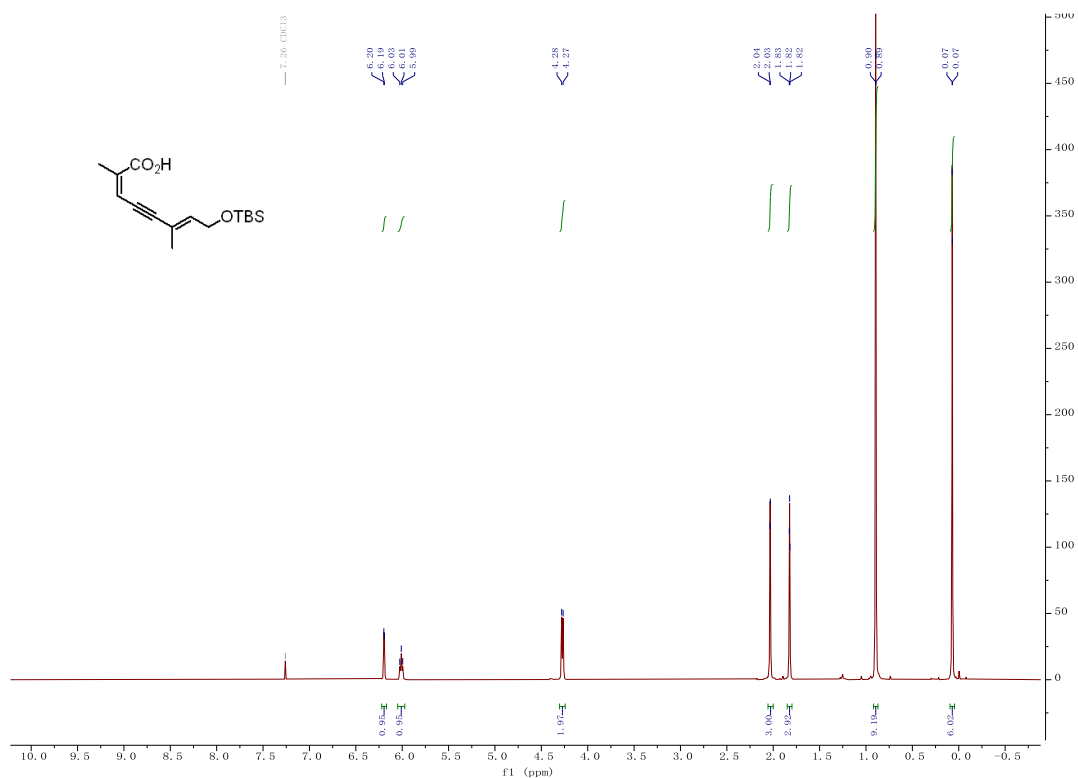

<sup>13</sup>C NMR of compound **23** (100 MHz, CDCl<sub>3</sub>)

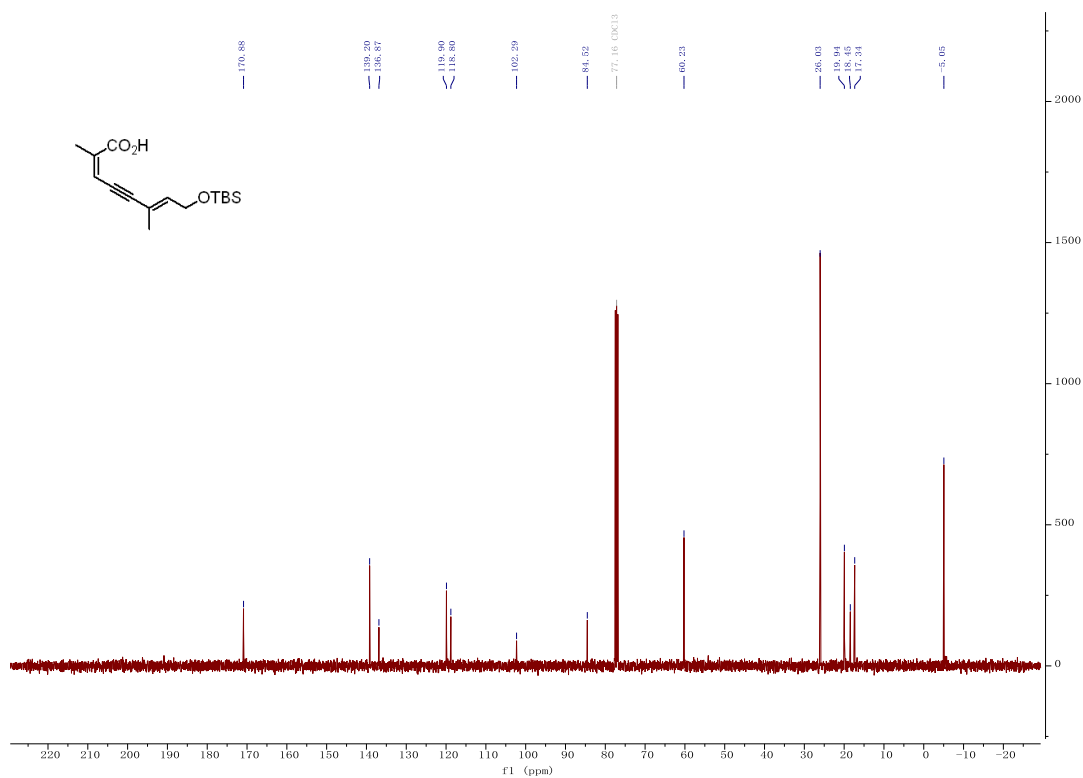

<sup>1</sup>H NMR of compound **24** (400 MHz, CDCl<sub>3</sub>)

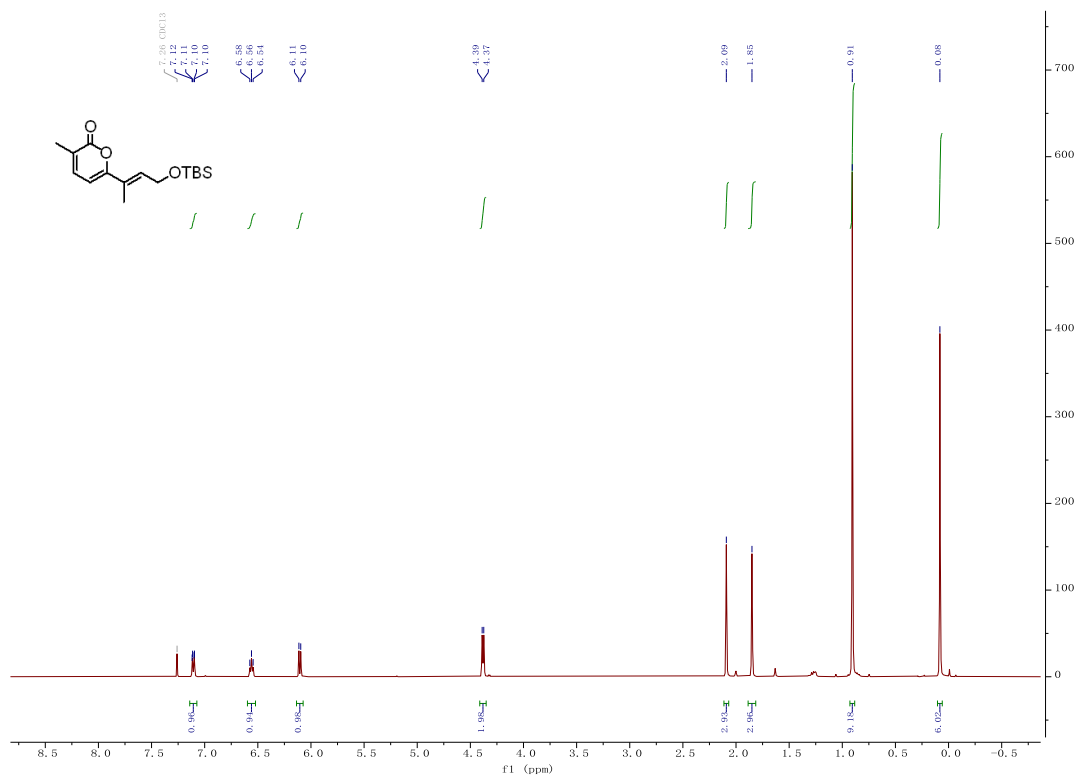

<sup>13</sup>C NMR of compound **24** (100 MHz, CDCl<sub>3</sub>)

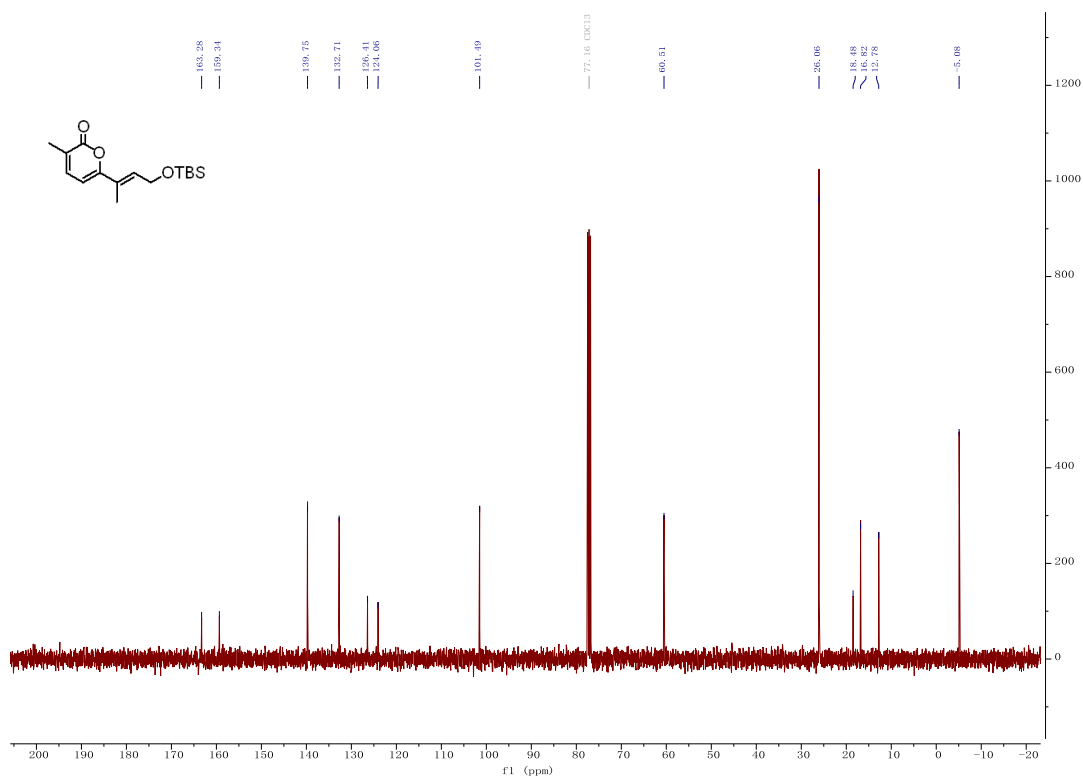

<sup>1</sup>H NMR of compound **25** (400 MHz, CDCl<sub>3</sub>)

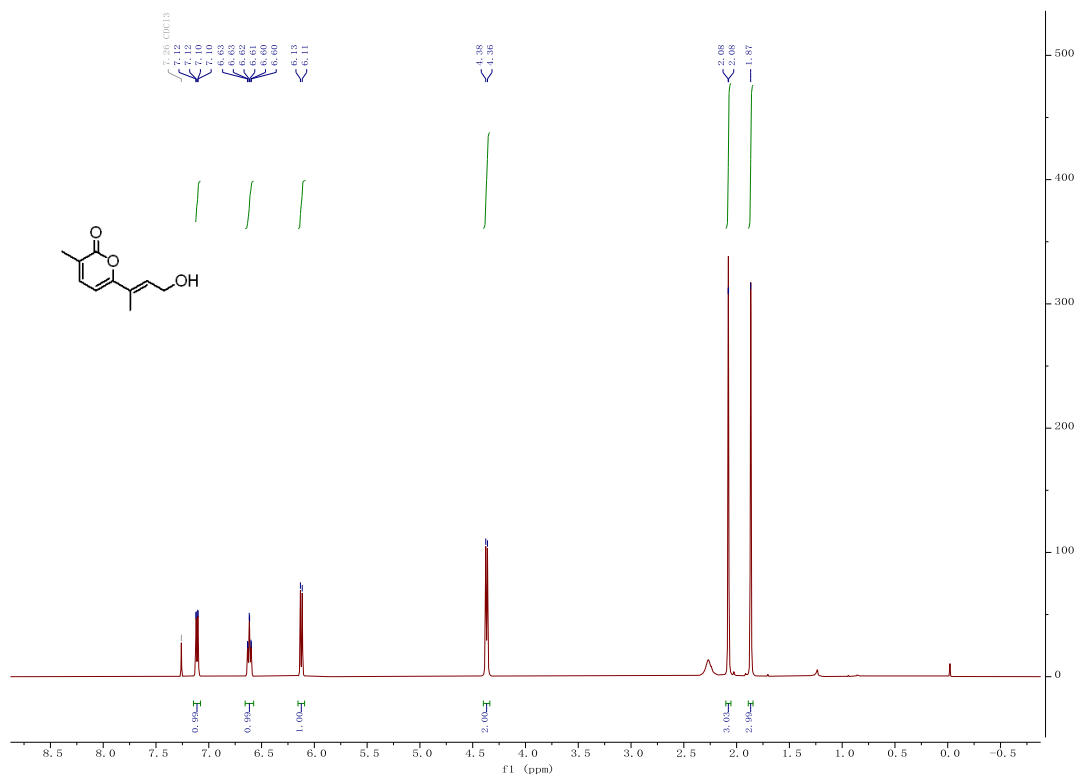

<sup>13</sup>C NMR of compound **25** (100 MHz, CDCl<sub>3</sub>)

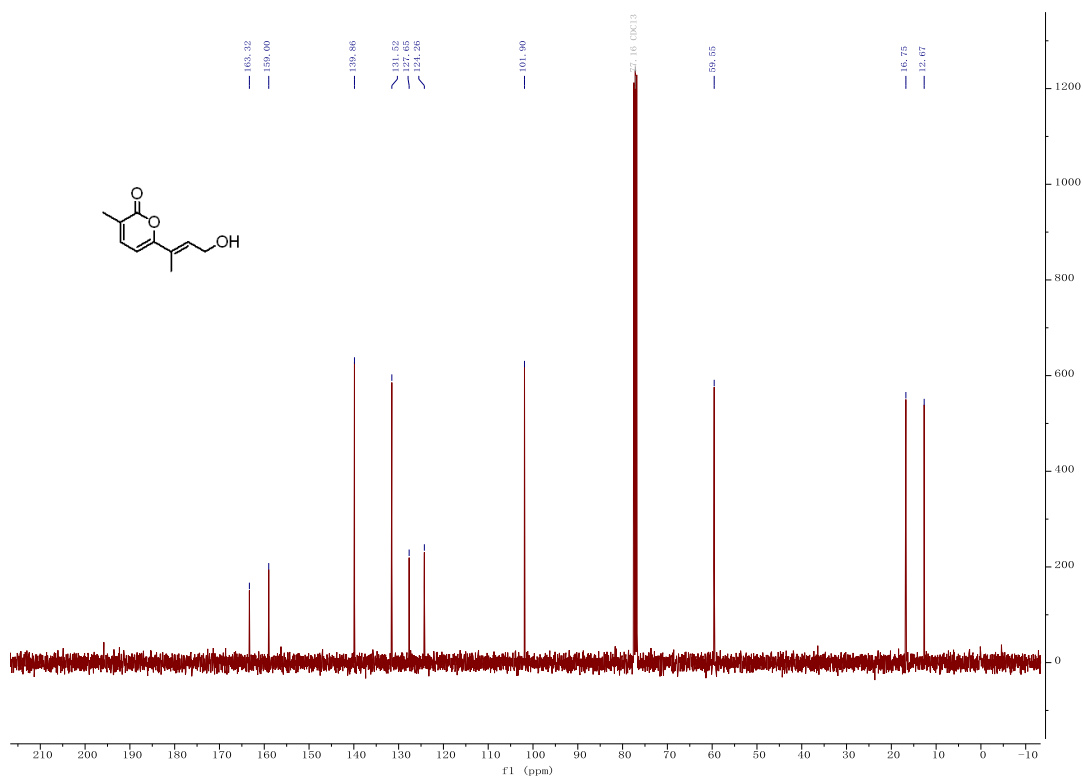

<sup>1</sup>H NMR of compound **2** (400 MHz, CDCl<sub>3</sub>)

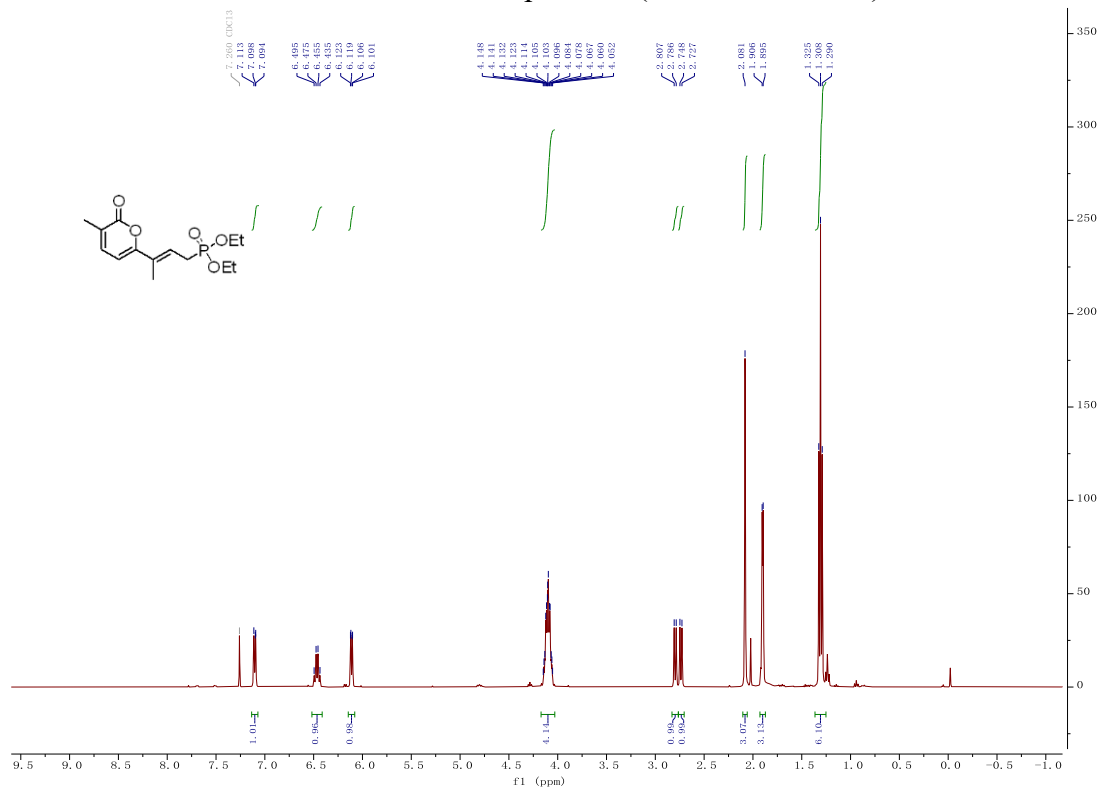

<sup>13</sup>C NMR of compound **2** (100 MHz, CDCl<sub>3</sub>)

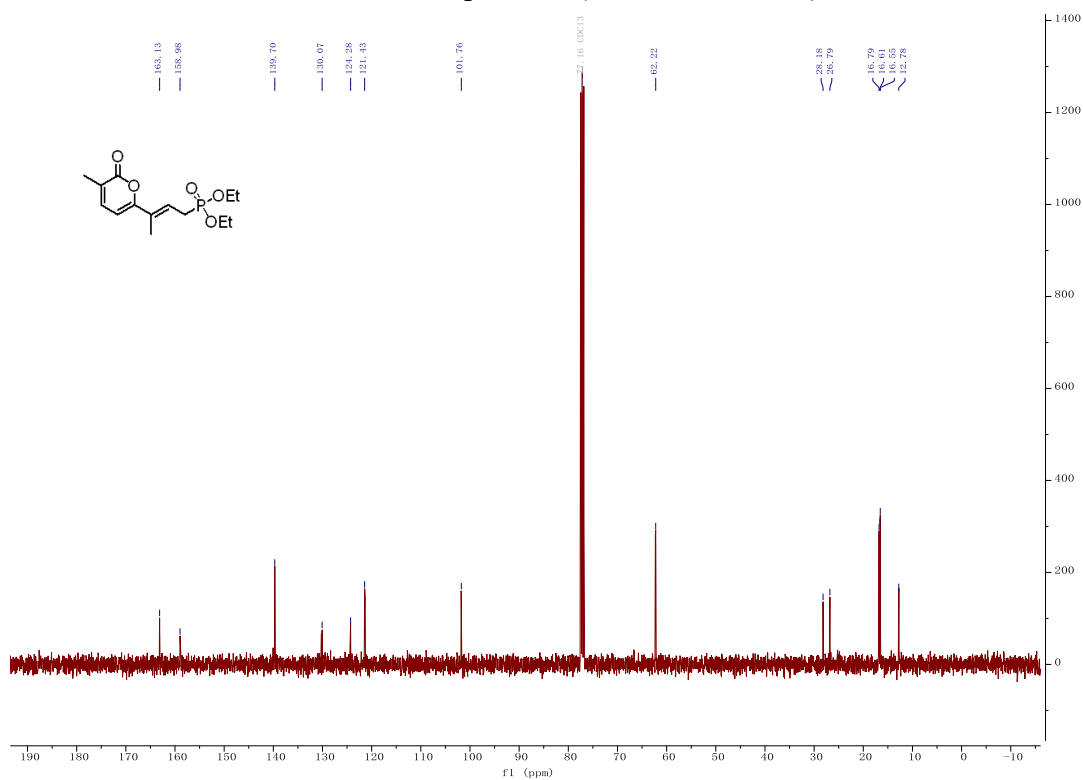

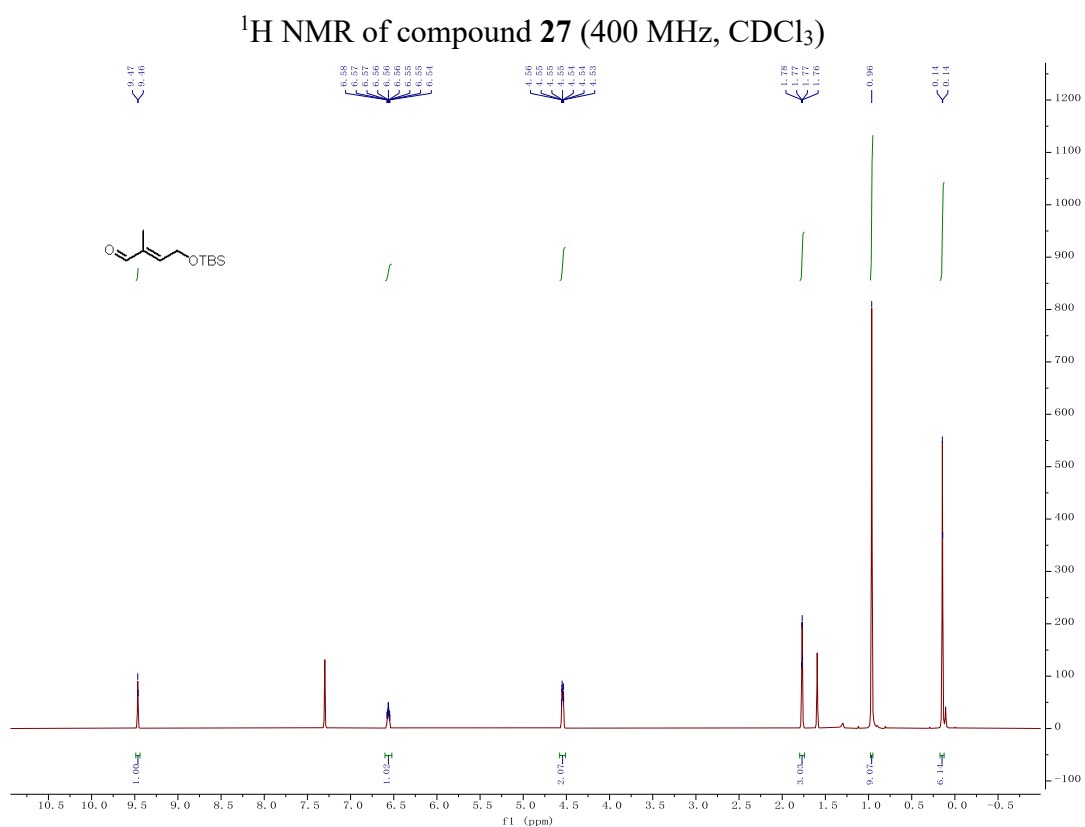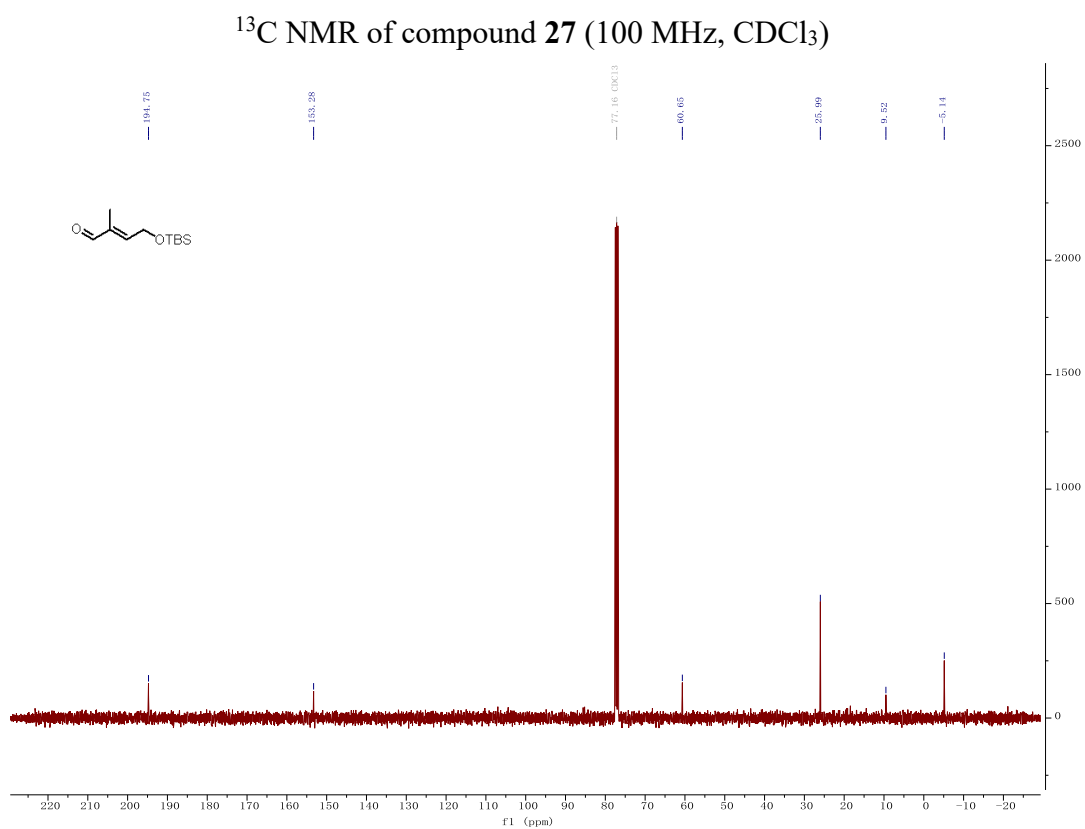

Chemical structure of compound 10: CCOC(=O)C(=C)C=CC(=C)COC(Si)(C)C(C)C

<sup>1</sup>H NMR spectrum (CDCl<sub>3</sub>) of compound 10. The x-axis represents the chemical shift in ppm (f1), ranging from -0.5 to 8.5. The y-axis represents the intensity, ranging from 0 to 700. The spectrum shows several peaks corresponding to the structure of 10.

Key peaks and integrations:

- Peak at ~1.2 ppm: Integration 3.00
- Peak at ~1.6 ppm: Integration 2.91
- Peak at ~1.8 ppm: Integration 3.02
- Peak at ~1.0 ppm: Integration 8.92
- Peak at ~0.1 ppm: Integration 5.94

Chemical shift values (ppm) for specific peaks are listed above the spectrum:

- 7.26, 7.26, 7.23 (CDCl<sub>3</sub> solvent)
- 6.57, 6.47, 6.44, 6.41
- 5.77, 5.76, 5.74
- 4.37, 4.35, 4.24, 4.24, 4.22, 4.22, 4.20, 4.19, 4.18
- 1.81, 1.33, 1.33, 1.31, 1.29, 1.29, 0.91
- 0.08, 0.08

Chemical structure: CCOC(=O)C=C/C=C/C=C/C=C/C

<sup>1</sup>H NMR spectrum (CDCl<sub>3</sub>) showing peaks at the following chemical shifts (ppm):

- 1.68, 63
- 1.43, 64
- 1.38, 66
- 1.35, 92
- 1.34, 24
- 1.26, 78
- 1.22, 94
- 7.7, 10 (CDCl<sub>3</sub>)
- 6.0, 65
- 6.0, 54
- 2.6, 108
- 1.8, 62
- 1.4, 47
- 1.2, 91
- 1.2, 73
- 5.00

<sup>1</sup>H NMR of compound **30** (400 MHz, CDCl<sub>3</sub>)

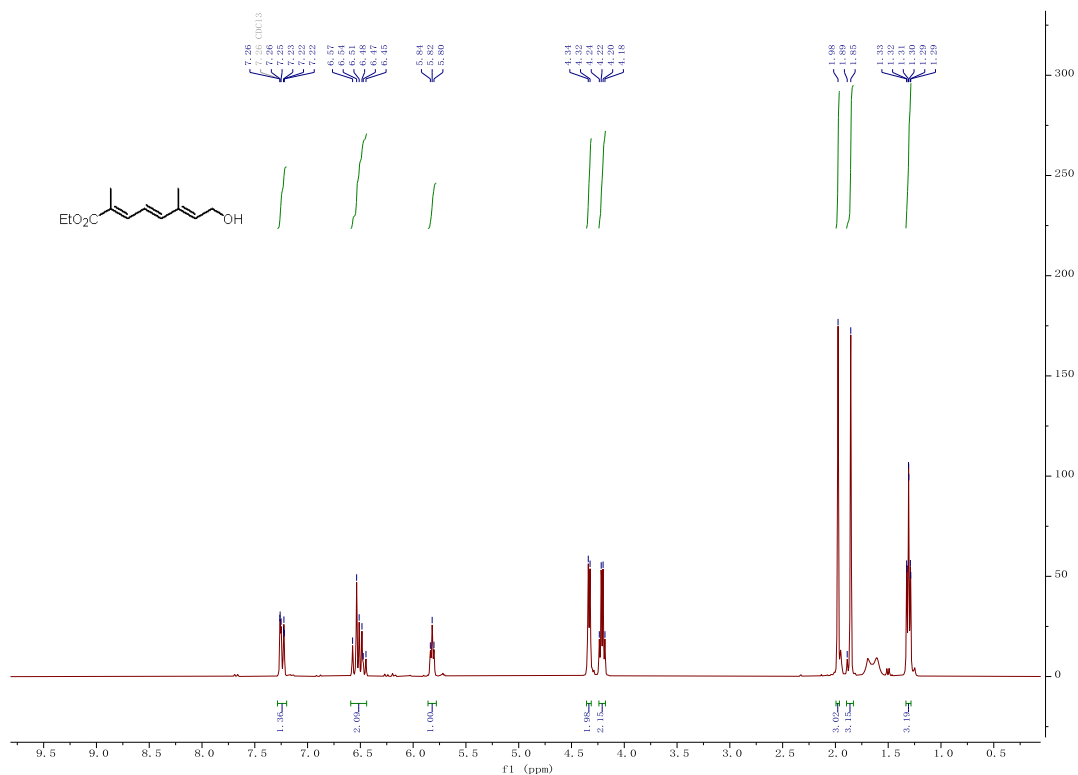

<sup>13</sup>C NMR of compound **30** (100 MHz, CDCl<sub>3</sub>)

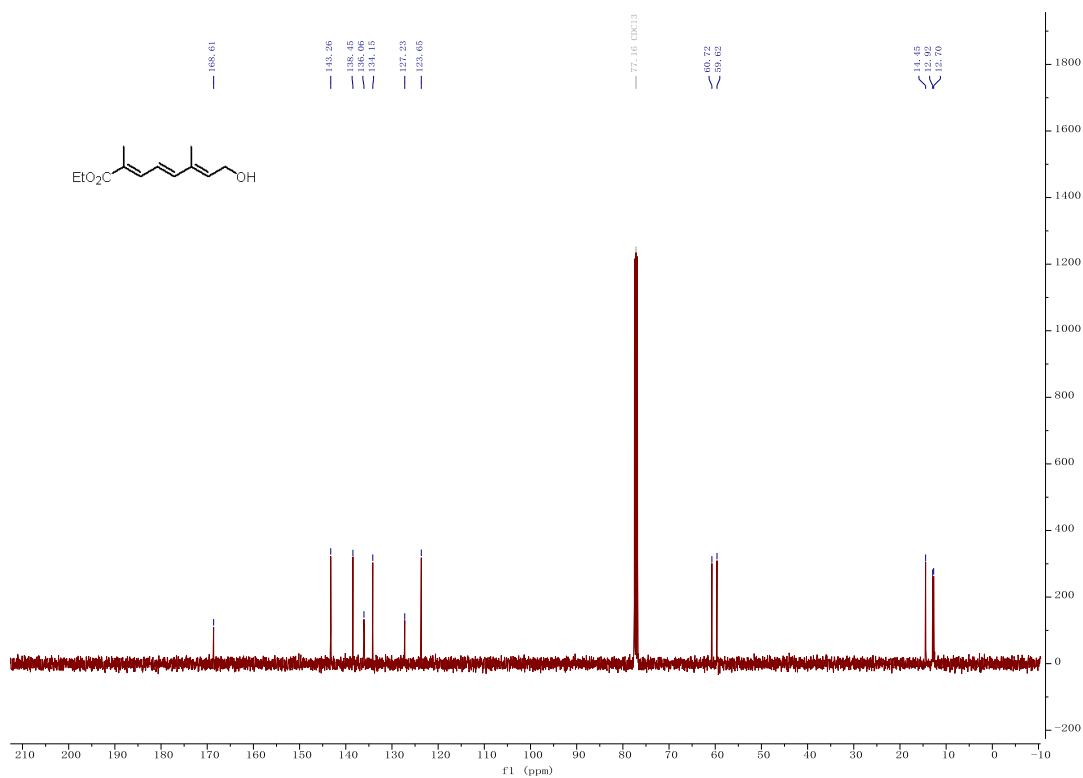



<sup>1</sup>H NMR of compound **3** (400 MHz, CDCl<sub>3</sub>)

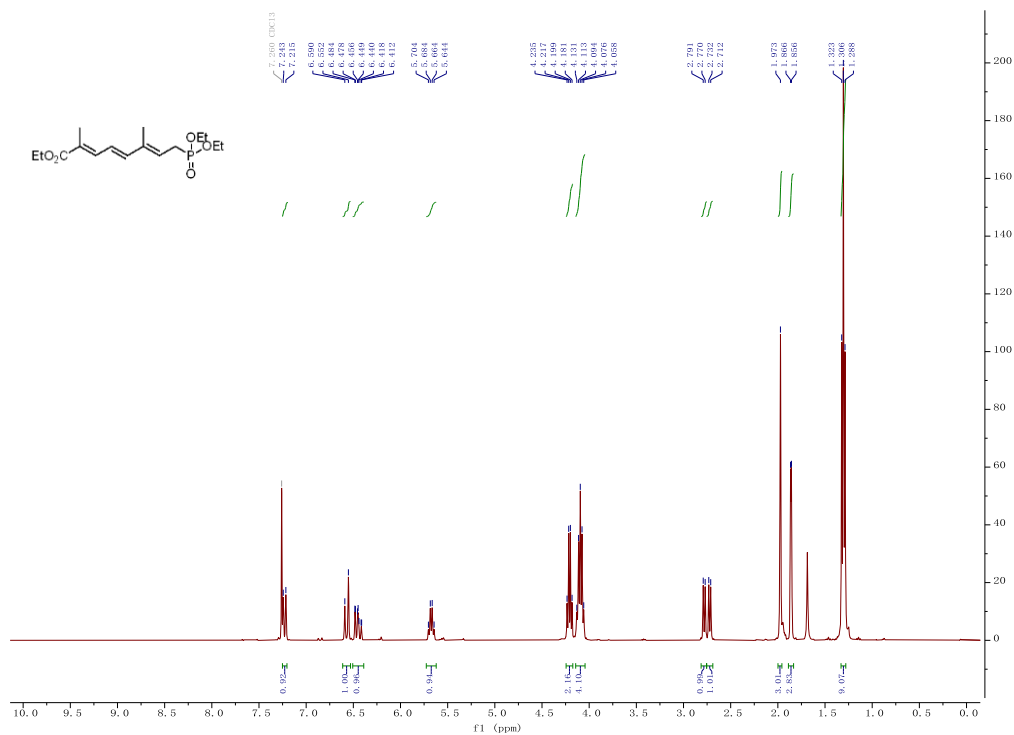

<sup>13</sup>C NMR of compound **3** (100 MHz, CDCl<sub>3</sub>)

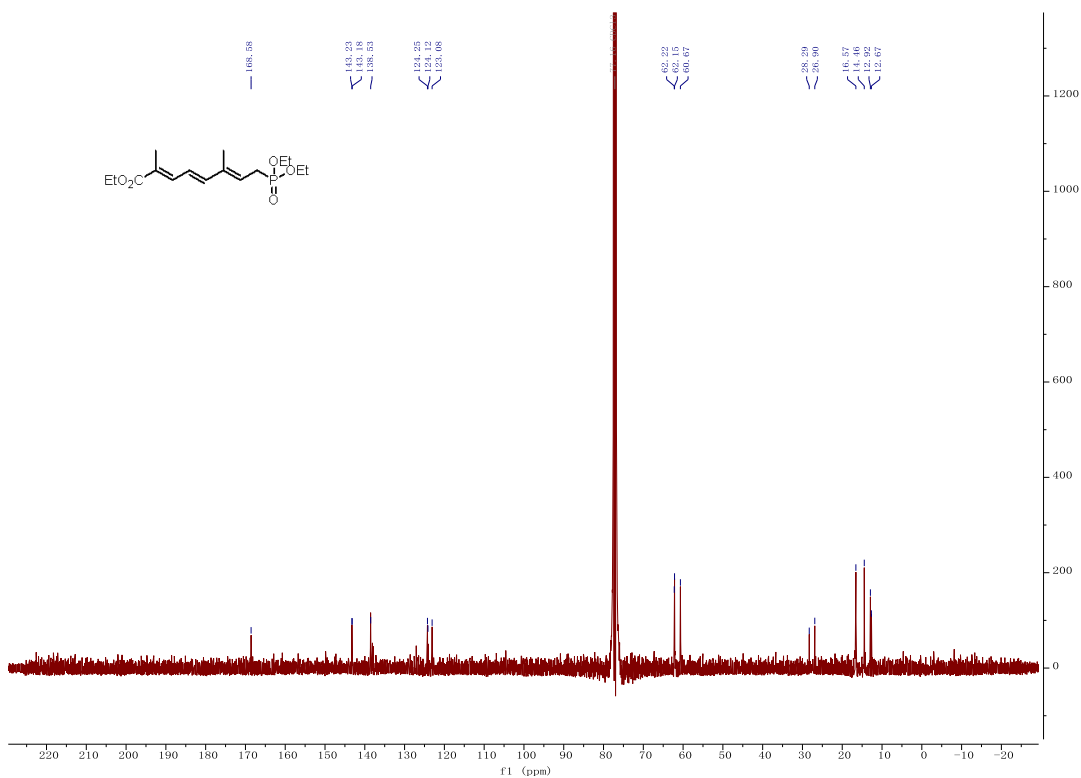

<sup>1</sup>H NMR of compound (±)**1a** (400 MHz, CDCl<sub>3</sub>)

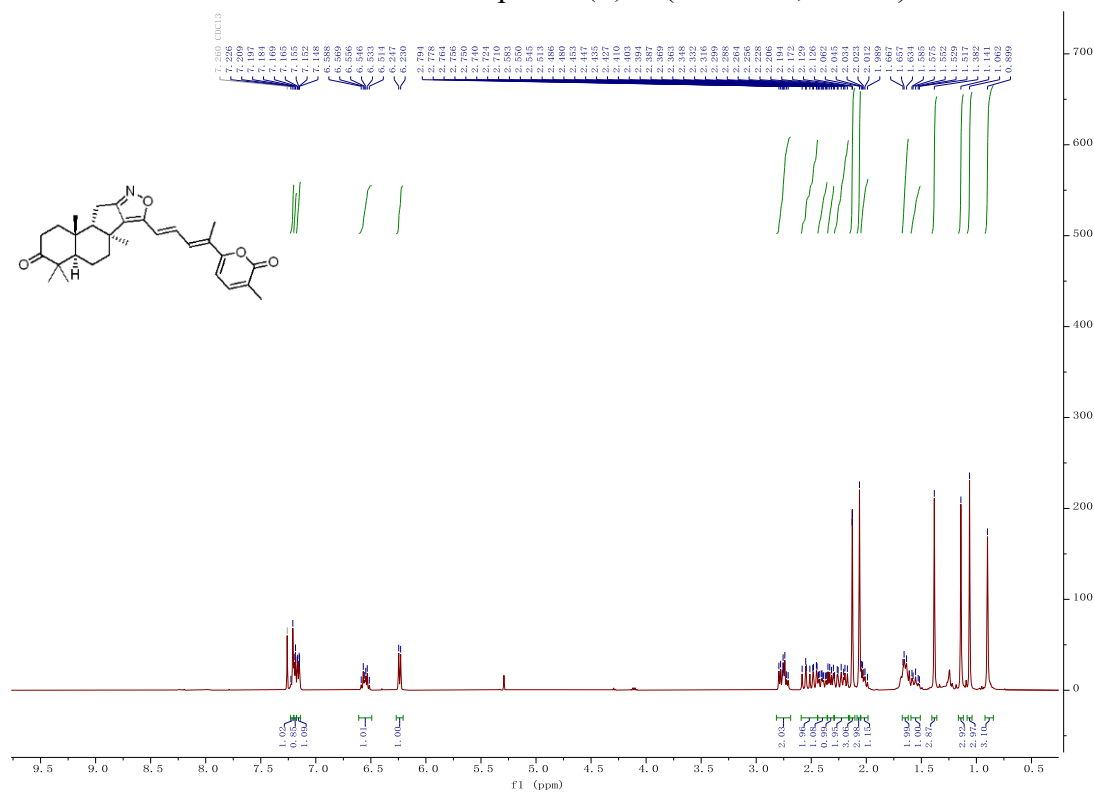

# <sup>1</sup>H NMR of compound (±)**1b** (400 MHz, CDCl<sub>3</sub>)

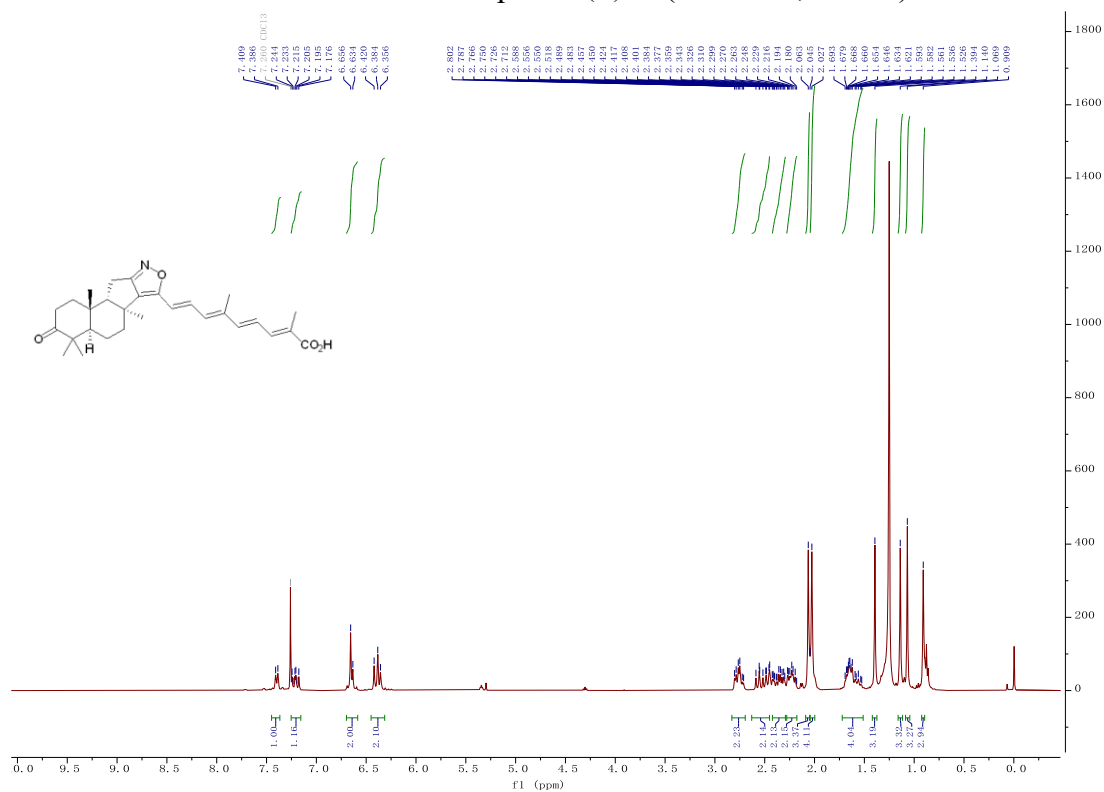

# <sup>13</sup>C NMR of compound (±)**1b** (100 MHz, CDCl<sub>3</sub>)

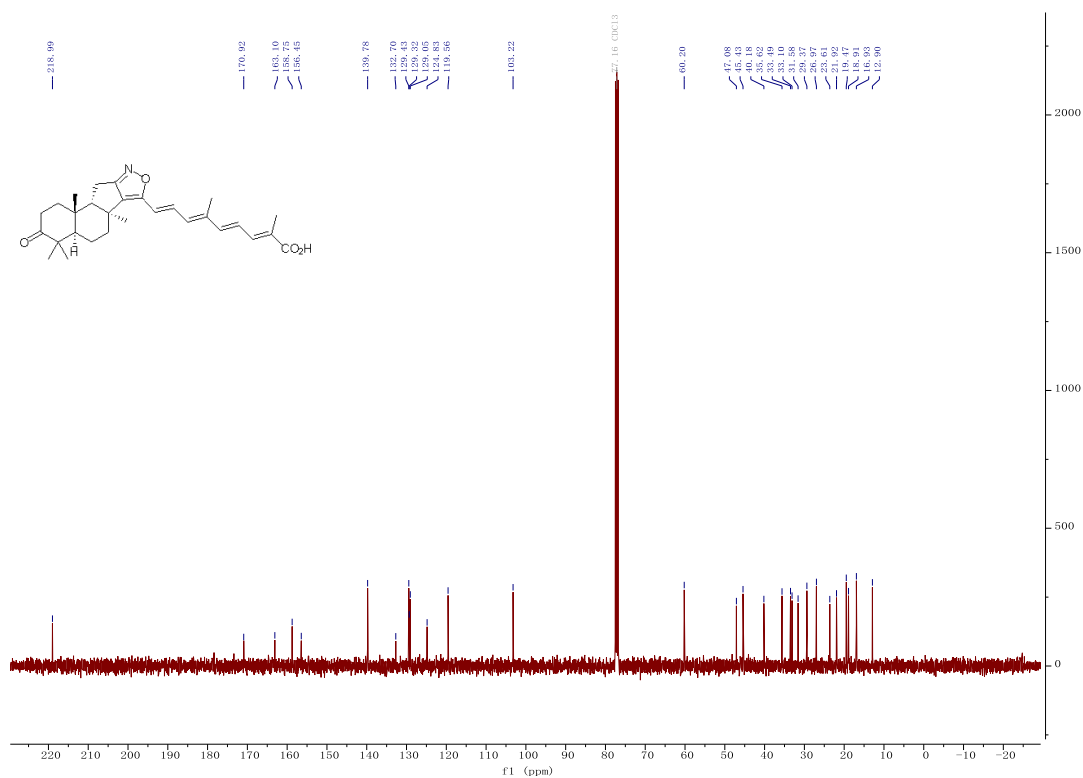

X-ray diffraction data of compound ( $\pm$ )**16** (CCDC 2473073)

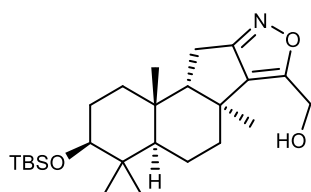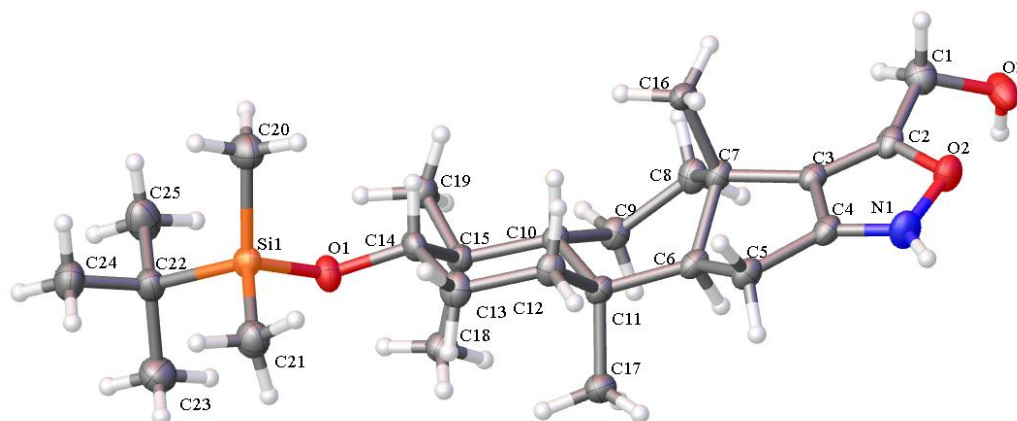

### Crystal data and structure refinement compound ( $\pm$ )**16**

|                                            |                                                    |
|--------------------------------------------|----------------------------------------------------|
| Identification code                        | WY1507                                             |
| Empirical formula                          | C <sub>25</sub> H <sub>43</sub> NO <sub>3</sub> Si |
| Formula weight                             | 433.69                                             |
| Temperature / K                            | 118.2(3)                                           |
| Crystal system                             | monoclinic                                         |
| Space group                                | P2 <sub>1</sub> /c                                 |
| a / Å, b / Å, c / Å                        | 24.8728(12), 8.1363(4),<br>12.3226(6)              |
| $\alpha$ /°, $\beta$ /°, $\gamma$ /°       | 90.00, 91.630(5), 90.00                            |
| Volume / Å <sup>3</sup>                    | 2492.8(2)                                          |
| Z                                          | 4                                                  |
| $\rho_{\text{calc}}$ / mg mm <sup>-3</sup> | 1.156                                              |
| $\mu$ / mm <sup>-1</sup>                   | 0.119                                              |
| F(000)                                     | 952                                                |
| Crystal size / mm <sup>3</sup>             | 0.42 × 0.39 × 0.02                                 |
| 2 $\theta$ range for data collection       | 5.98 to 52°                                        |
| Index ranges                               | -30 ≤ h ≤ 30, -10 ≤ k ≤<br>10, -15 ≤ l ≤ 14        |
| Reflections collected                      | 22043                                              |
| Independent reflections                    | 4840[R(int) = 0.0861<br>(inf-0.9Å)]                |
| Data/restraints/parameters                 | 4840/0/281                                         |

|                                                                |                                  |
|----------------------------------------------------------------|----------------------------------|
| Goodness-of-fit on $F^2$                                       | 1.044                            |
| Final R indexes [ $I > 2\sigma(I)$ i.e. $F_o > 4\sigma(F_o)$ ] | $R_1 = 0.0568$ , $wR_2 = 0.1195$ |
| Final R indexes [all data]                                     | $R_1 = 0.0870$ , $wR_2 = 0.1364$ |
| Largest diff. peak/hole / $e \text{ \AA}^{-3}$                 | 0.302/-0.334                     |
| Flack Parameters                                               | N                                |
| Completeness                                                   | 0.9975                           |

**Table S1 The comparison of  $^{13}\text{C}$  NMR data of 25 and reported natural Gibepyrone B<sup>1</sup>**

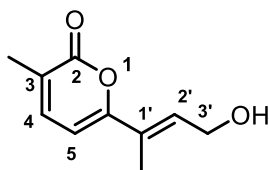

**25 (Gibepyrone B)**

|                    | Gibepyrone B <sup>1</sup><br>$^{13}\text{C}$ NMR( $\delta$ ppm) | 25<br>$^{13}\text{C}$ NMR( $\delta$ ppm) |
|--------------------|-----------------------------------------------------------------|------------------------------------------|
| C-2                | 163.2                                                           | 163.3                                    |
| C-3                | 128.3                                                           | 127.7                                    |
| C-4                | 139.7                                                           | 139.9                                    |
| C-5                | 101.9                                                           | 101.9                                    |
| C-6                | 160.0                                                           | 159.0                                    |
| C-1'               | 124.5                                                           | 124.3                                    |
| C-2'               | 131.1                                                           | 131.5                                    |
| C-3'               | 59.6                                                            | 59.6                                     |
| 3-CH <sub>3</sub>  | 16.8                                                            | 16.8                                     |
| 1'-CH <sub>3</sub> | 12.7                                                            | 12.7                                     |

**Reference:**

1. A. F. Barrero, J. E. Oltra, M. M. Herrador, E. Cabrera, J. F. Sanchez, J. F. Quílez, F. J. Rojas and J. F. Reyes, *Tetrahedron*, 1993, **49**, 141-150.

## The biological activity evaluation for (±)1a and (±)1b

HL-60 human leukemia cell line was obtained from China Infrastructure of Cell Line Resources (Beijing, China). The cells were cultured in RPMI1640 medium supplemented with 10% FBS, 100 U/mL penicillin, and 100 mg/mL streptomycin at 37 °C in an atmosphere of 5% CO<sub>2</sub>. The cells were then treated with a range of concentrations of compounds, along with a vehicle control (DMSO), in triplicate. After 72 hours of incubation, 30 µL of CellTiter-Glo reagent was added to each well. The plate was mixed on an orbital shaker for 2 minutes to induce cell lysis and subsequently incubated at room temperature for 10 minutes. Luminescence was recorded using a BioTek Synergy H1 plate reader. The half-maximal inhibitory concentration (IC<sub>50</sub>) values were calculated using GraphPad Prism software (version 8.1, GraphPad Software, San Diego, CA, USA).

(A)

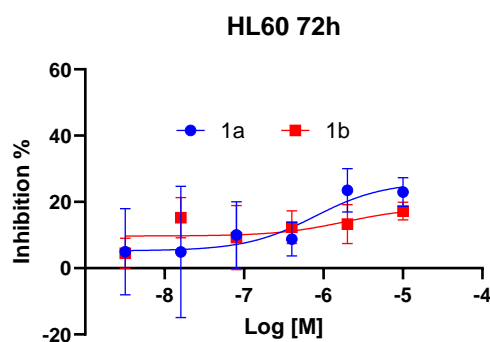

(B)

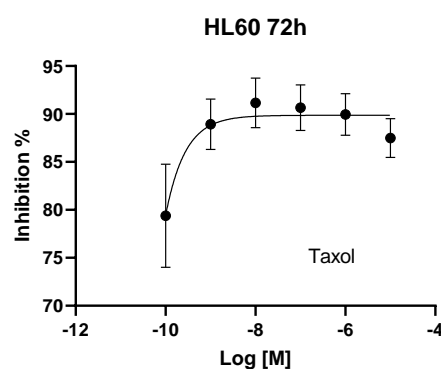

Figure S1 (A) Antiproliferative activity of the model compounds in HL60 cell. (B) Antiproliferative activity of Taxol in HL60 cell.

**TableS2 Antiproliferative activity of 1a and 1b in HL60 cell line**

| HL60     |                       |
|----------|-----------------------|
| Compound | IC <sub>50</sub> (µM) |
| 1a       | >10                   |
| 1b       | >10                   |
| Taxol    | <0.0001               |
